# Supplementary material for: Nortriterpenoids from the Fruiting Bodies of the Mushroom Ganoderma resinaceum
Source: MDPI journal article supplement (doi:10.3390/molecules22071073), 2017-06-28
Supplement: s1 [file s1]

## Supplementary data

### Nortriterpenoids from the fruiting bodies of the mushroom *Ganoderma resinaceum*

Xian-Qiang Chen <sup>1</sup>, Ling-Xiao Chen <sup>1</sup>, Jing Zhao <sup>1,\*</sup>, Yu-Ping Tang <sup>2</sup> and Shao-Ping Li <sup>1,\*</sup>

<sup>1</sup> State Key Laboratory of Quality Research in Chinese Medicine, Institute of Chinese Medical Sciences, University of Macau, Macau, China; yb27528@umac.mo (X.-Q.C.); yb47517@umac.mo (L.-X.C.)

<sup>2</sup> Jiangsu Collaborative Innovation Center of Chinese Medicinal Resources Industrialization, Jiangsu Key Laboratory for High Technology Research of TCM Formulae, and National and Local Collaborative Engineering Center of Chinese Medicinal Resources Industrialization and Formulae Innovative Medicine, Nanjing University of Chinese Medicine, Jiangsu, China

\* Correspondence: zhaojing.cpu@163.com (J.Z.); spli@umac.mo (S.-P.L.); Tel.: +853-88224692; Fax: +853-28841358

## List of contents

- Fig. S1** Separation flow chart of *Ganoderma resinaceum*
- Fig. S2**  $^1\text{H}$  NMR (600 MHz,  $\text{CD}_3\text{OD}$ ) spectrum of lucidone I (1)
- Fig. S3**  $^{13}\text{C}$  NMR (150 MHz,  $\text{CD}_3\text{OD}$ ) spectrum of lucidone I (1)
- Fig. S4** HSQC (600 MHz,  $\text{CD}_3\text{OD}$ ) spectrum of lucidone I (1)
- Fig. S5** HMBC (600 MHz,  $\text{CD}_3\text{OD}$ ) spectrum of lucidone I (1)
- Fig. S6**  $^1\text{H}$ - $^1\text{H}$  COSY (600 MHz,  $\text{CD}_3\text{OD}$ ) spectrum of lucidone I (1)
- Fig. S7** ROESY (600 MHz,  $\text{CD}_3\text{OD}$ ) spectrum of lucidone I (1)
- Fig. S8** IR spectrum of lucidone I (1)
- Fig. S9** HRESIMS spectrum of lucidone I (1)
- Fig. S10**  $^1\text{H}$  NMR (600 MHz,  $\text{CD}_3\text{OD}$ ) spectrum of lucidone J (2)
- Fig. S11**  $^{13}\text{C}$  NMR (150 MHz,  $\text{CD}_3\text{OD}$ ) spectrum of lucidone J (2)
- Fig. S12** HSQC (600 MHz,  $\text{CD}_3\text{OD}$ ) spectrum of lucidone J (2)
- Fig. S13** HMBC (600 MHz,  $\text{CD}_3\text{OD}$ ) spectrum of lucidone J (2)
- Fig. S14**  $^1\text{H}$ - $^1\text{H}$  COSY (600 MHz,  $\text{CD}_3\text{OD}$ ) spectrum of lucidone J (2)
- Fig. S15** ROESY (600 MHz,  $\text{CD}_3\text{OD}$ ) spectrum of lucidone J (2)
- Fig. S16** IR spectrum of lucidone J (2)
- Fig. S17** HRESIMS spectrum of lucidone J (2)
- Fig. S18**  $^1\text{H}$  NMR (600 MHz,  $\text{CD}_3\text{OD}$ ) spectrum of lucidone K (3)
- Fig. S19**  $^{13}\text{C}$  NMR (150 MHz,  $\text{CD}_3\text{OD}$ ) spectrum of lucidone K (3)
- Fig. S20** HSQC (600 MHz,  $\text{CD}_3\text{OD}$ ) spectrum of lucidone K (3)
- Fig. S21** HMBC (600 MHz,  $\text{CD}_3\text{OD}$ ) spectrum of lucidone K (3)
- Fig. S22**  $^1\text{H}$ - $^1\text{H}$  COSY (600 MHz,  $\text{CD}_3\text{OD}$ ) spectrum of lucidone K (3)
- Fig. S23** ROESY (600 MHz,  $\text{CD}_3\text{OD}$ ) spectrum of lucidone K (3)
- Fig. S24** IR spectrum of lucidone K (3)
- Fig. S25** HRESIMS spectrum of lucidone K (3)
- Fig. S26**  $^1\text{H}$  NMR (600 MHz,  $\text{CD}_3\text{OD}$ ) spectrum of lucidone L (4)
- Fig. S27**  $^{13}\text{C}$  NMR (150 MHz,  $\text{CD}_3\text{OD}$ ) spectrum of lucidone L (4)
- Fig. S28** HSQC (600 MHz,  $\text{CD}_3\text{OD}$ ) spectrum of lucidone L (4)
- Fig. S29** HMBC (600 MHz,  $\text{CD}_3\text{OD}$ ) spectrum of Lucidone L (4)

**Fig. S30**  $^1\text{H}$ - $^1\text{H}$  COSY (600 MHz,  $\text{CD}_3\text{OD}$ ) spectrum of lucidone L (4)

**Fig. S31** ROESY (600 MHz,  $\text{CD}_3\text{OD}$ ) spectrum of lucidone L (4)

**Fig. S32** IR spectrum of lucidone L (4)

**Fig. S33** HRESIMS spectrum of lucidone L (4)

**Fig. S34**  $^1\text{H}$  NMR (600 MHz,  $\text{CDCl}_3$ ) spectrum of ganosineniol B (5)

**Fig. S35**  $^{13}\text{C}$  NMR (150 MHz,  $\text{CDCl}_3$ ) spectrum of ganosineniol B (5)

**Fig. S36** DEPT135 NMR (150 MHz,  $\text{CDCl}_3$ ) spectrum of ganosineniol B (5)

**Fig. S37** HMBC (600 MHz,  $\text{CDCl}_3$ ) spectrum of ganosineniol B (5)

**Fig. S38**  $^1\text{H}$ - $^1\text{H}$  COSY (600 MHz,  $\text{CDCl}_3$ ) spectrum of ganosineniol B (5)

**Fig. S39** ROESY (600 MHz,  $\text{CDCl}_3$ ) spectrum of ganosineniol B (5)

**Fig. S40** IR spectrum of ganosineniol B (5)

**Fig. S41** HRESIMS spectrum of ganosineniol B (5)

**Fig. S42**  $^1\text{H}$  NMR (600 MHz,  $\text{CD}_3\text{OD}$ ) spectrum of ganosineniol C (6)

**Fig. S43**  $^{13}\text{C}$  NMR (150 MHz,  $\text{CD}_3\text{OD}$ ) spectrum of ganosineniol C (6)

**Fig. S44** HSQC (600 MHz,  $\text{CD}_3\text{OD}$ ) spectrum of ganosineniol C (6)

**Fig. S45** HMBC (600 MHz,  $\text{CD}_3\text{OD}$ ) spectrum of ganosineniol C (6)

**Fig. S46**  $^1\text{H}$ - $^1\text{H}$  COSY (600 MHz,  $\text{CD}_3\text{OD}$ ) spectrum of ganosineniol C (6)

**Fig. S47** ROESY (600 MHz,  $\text{CD}_3\text{OD}$ ) spectrum of ganosineniol C (6)

**Fig. S48** IR spectrum of ganosineniol C (6)

**Fig. S49** HRESIMS spectrum of ganosineniol C (6)

Table S1 Inhibition rate of nortriterpenoids from *Ganoderma* at the concentration of 3 mM

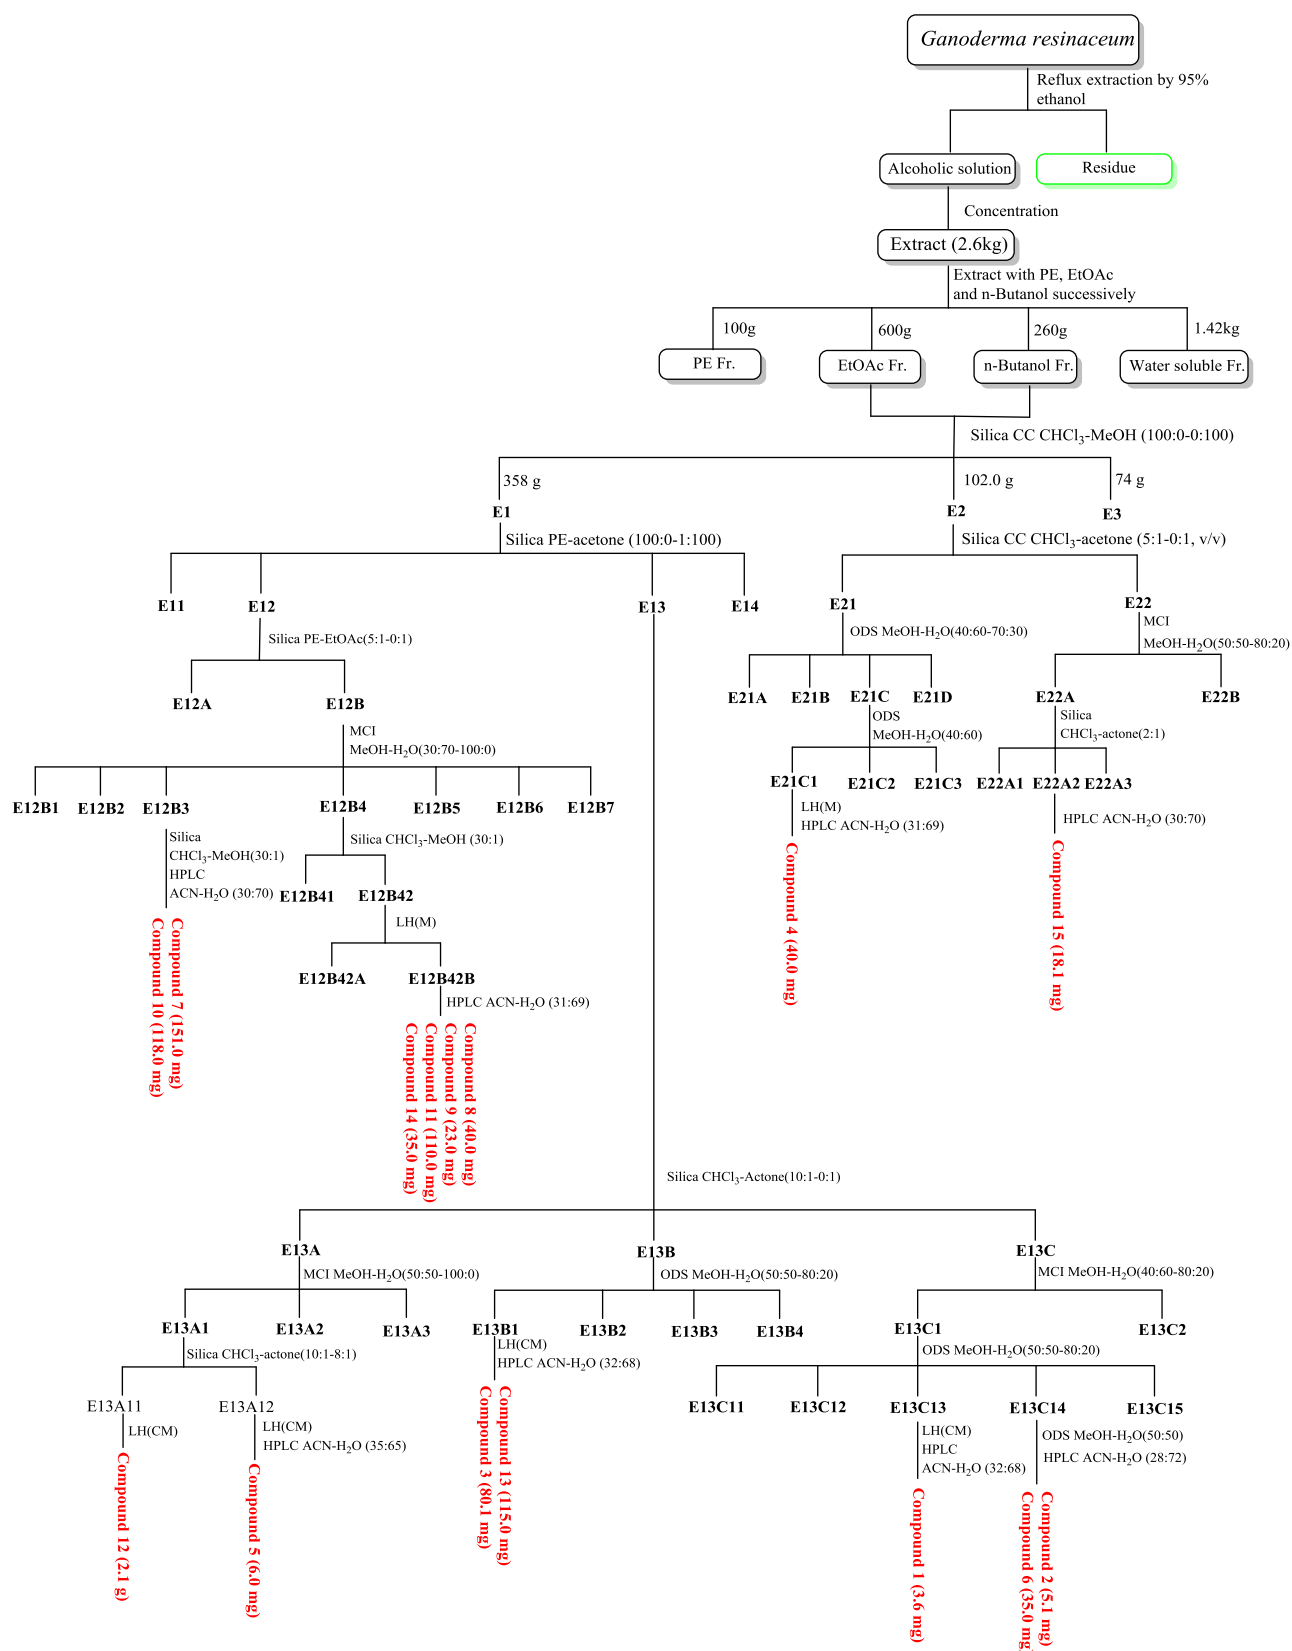

**Fig. S1** Separation flow chart of *Ganoderma resinaceum*

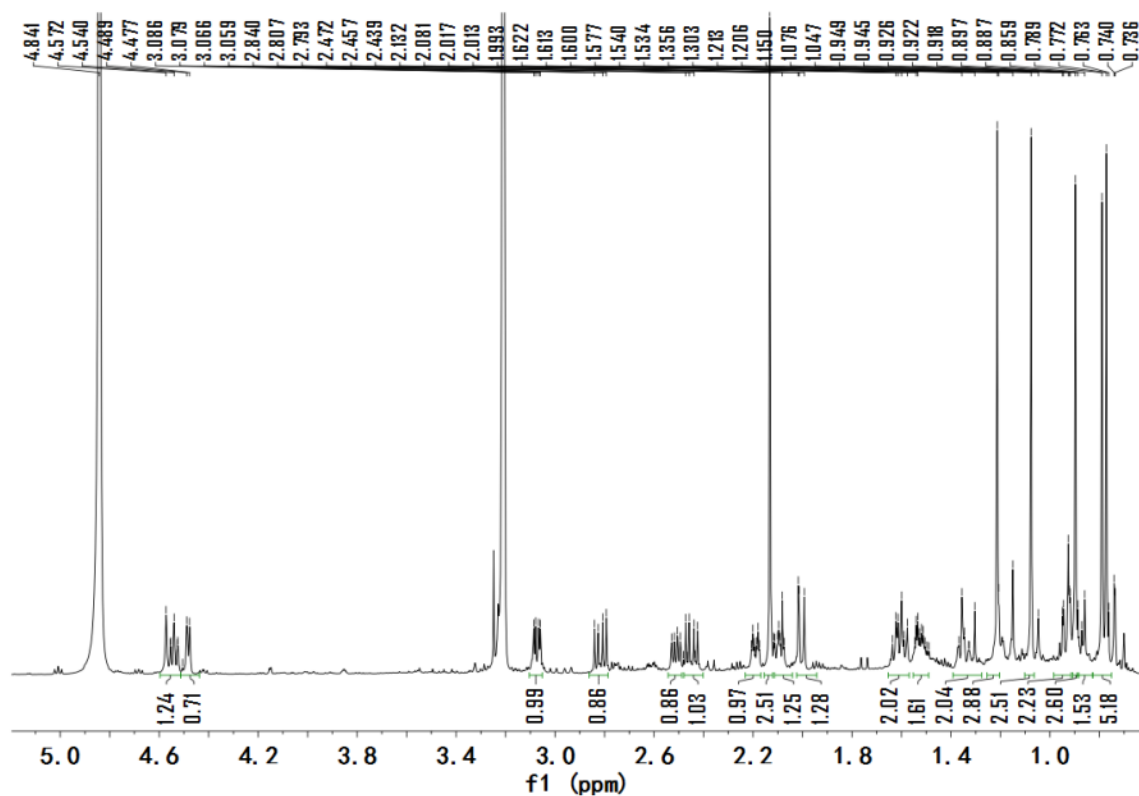

**Fig. S2**  $^1\text{H}$  NMR (600 MHz,  $\text{CD}_3\text{OD}$ ) spectrum of lucidone I (**1**)

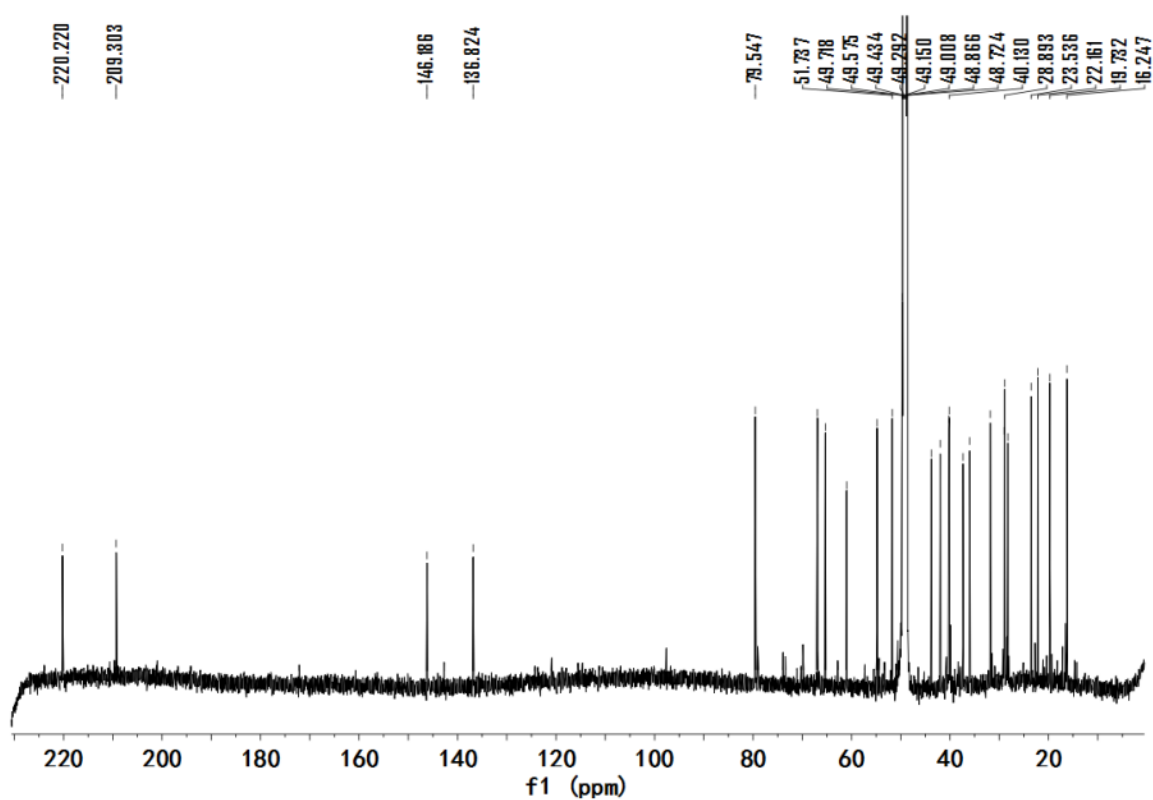

**Fig. S3**  $^{13}\text{C}$  NMR (150 MHz,  $\text{CD}_3\text{OD}$ ) spectrum of lucidone I (**1**)

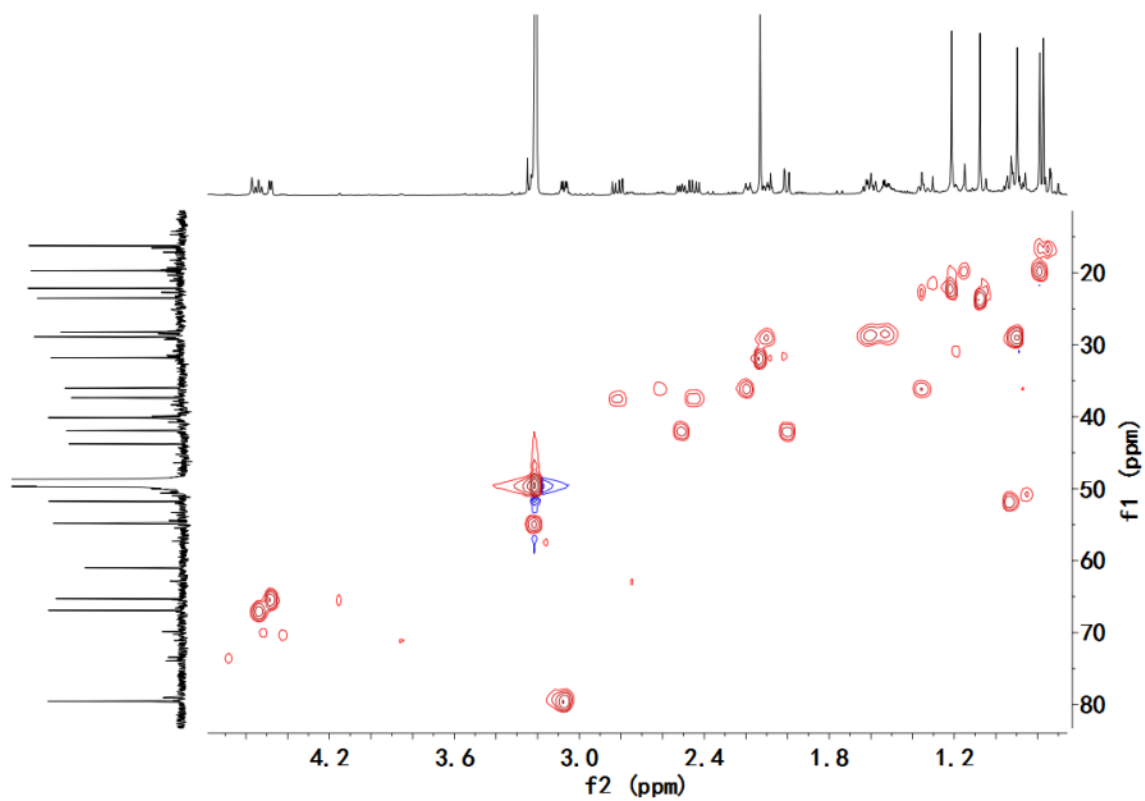

**Fig. S4** HSQC (600 MHz, CD<sub>3</sub>OD) spectrum of lucidone I (1)

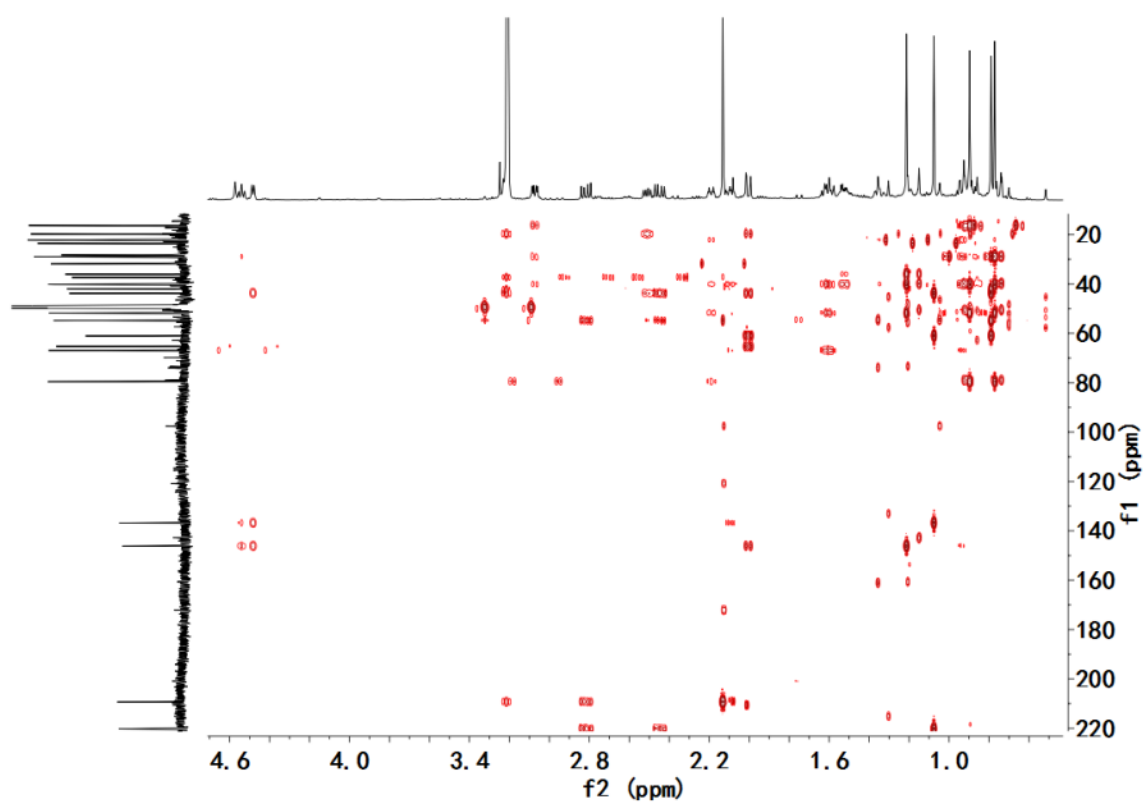

**Fig. S5** HMBC (600 MHz, CD<sub>3</sub>OD) spectrum of lucidone I (1)

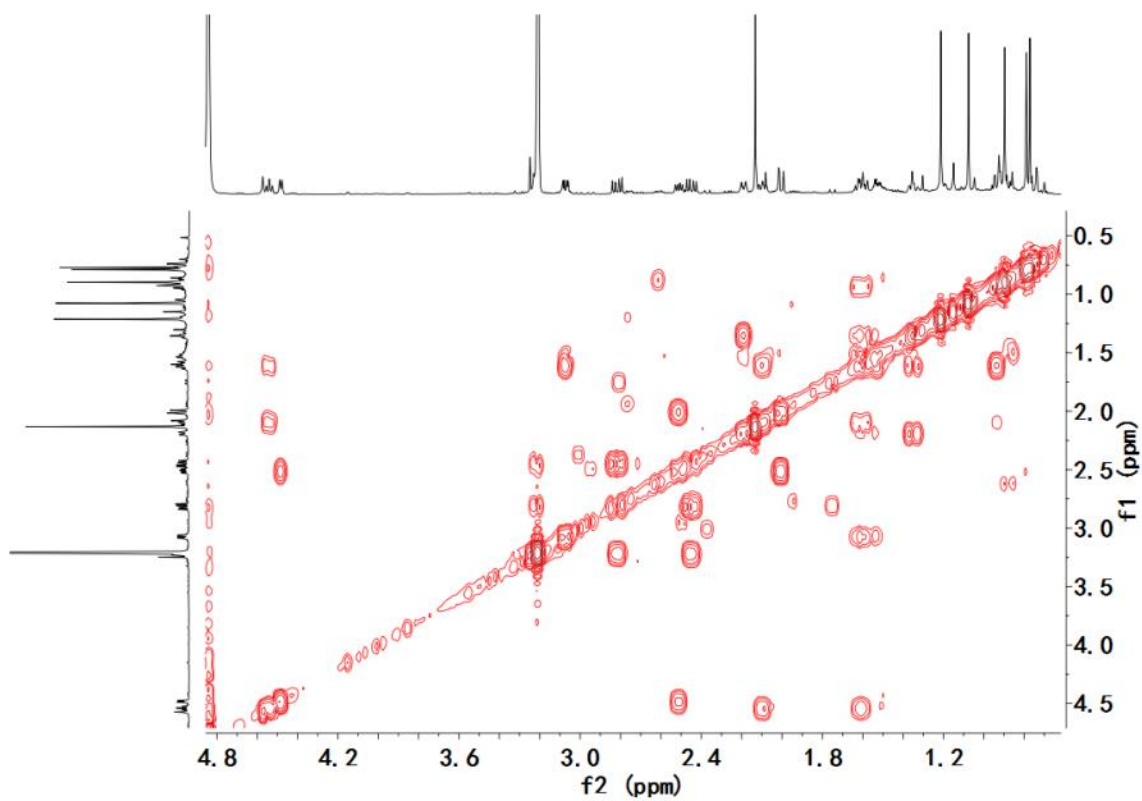

**Fig. S6**  $^1\text{H}$ - $^1\text{H}$  COSY (600 MHz,  $\text{CD}_3\text{OD}$ ) spectrum of lucidone I (**1**)

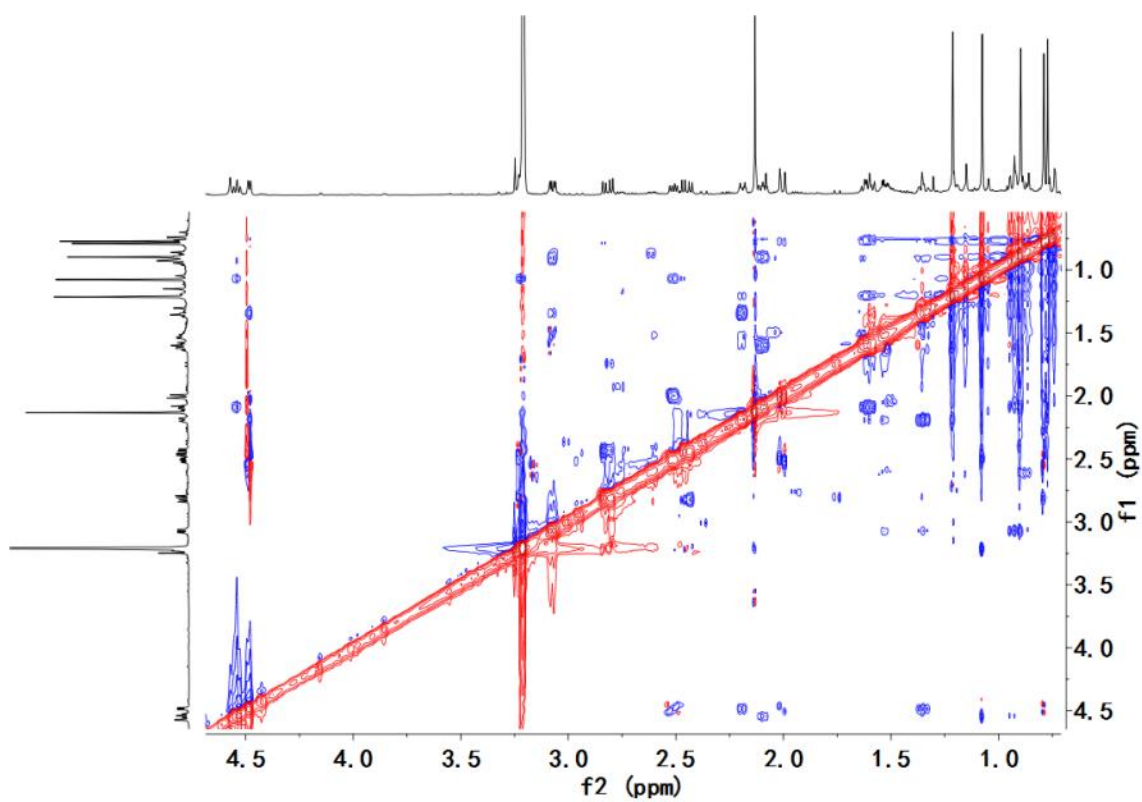

**Fig. S7** ROESY (600 MHz,  $\text{CD}_3\text{OD}$ ) spectrum of lucidone I (**1**)

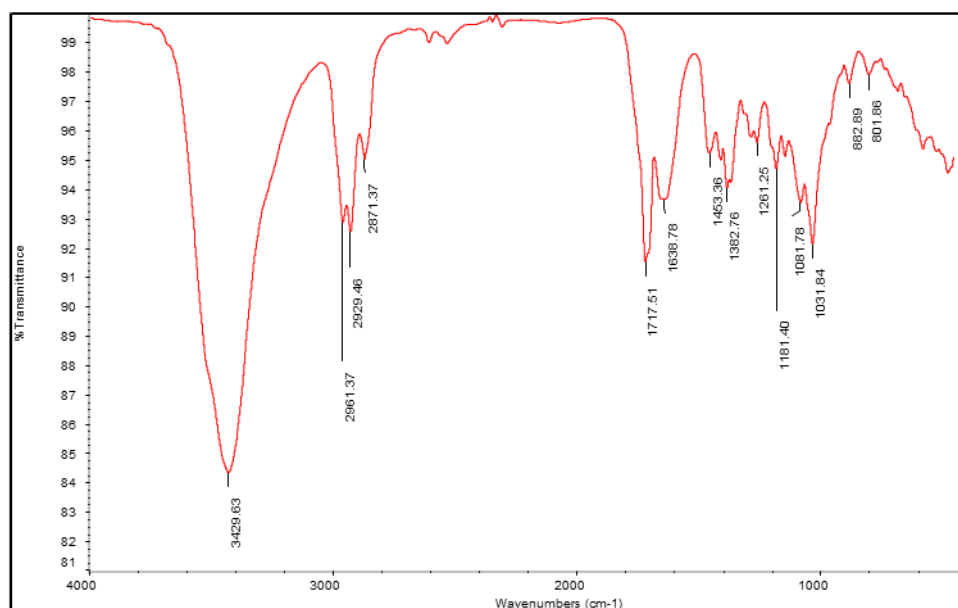

**Fig. S8** IR spectrum of lucidone I (**1**)

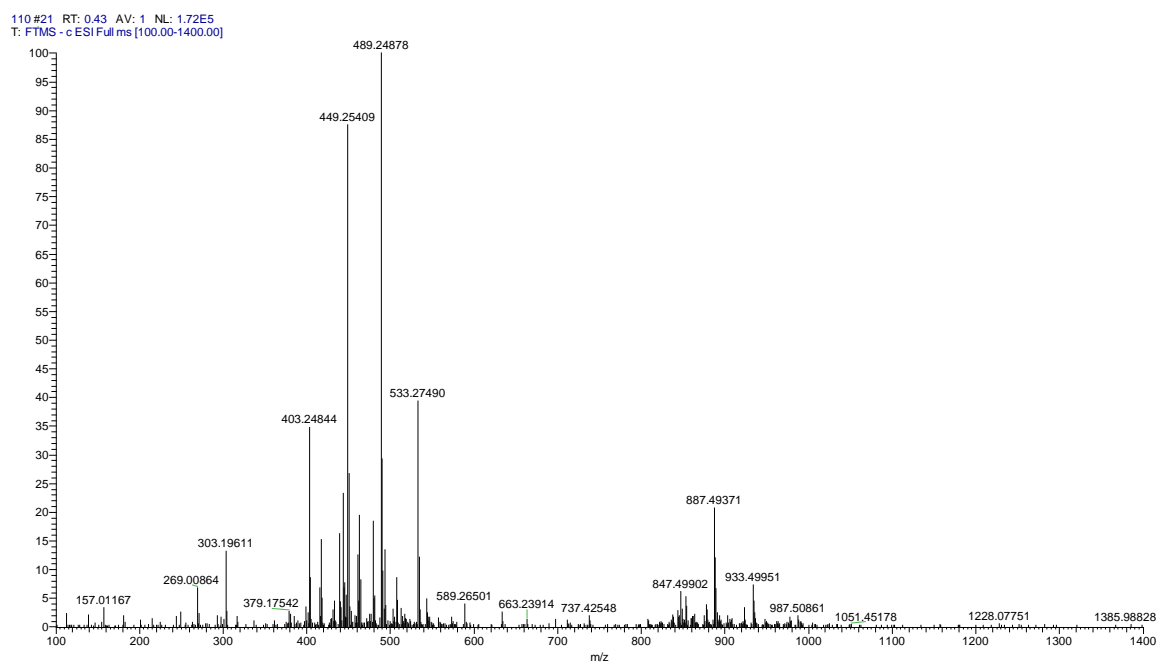

**Fig. S9** HRESIMS spectrum of lucidone I (**1**)



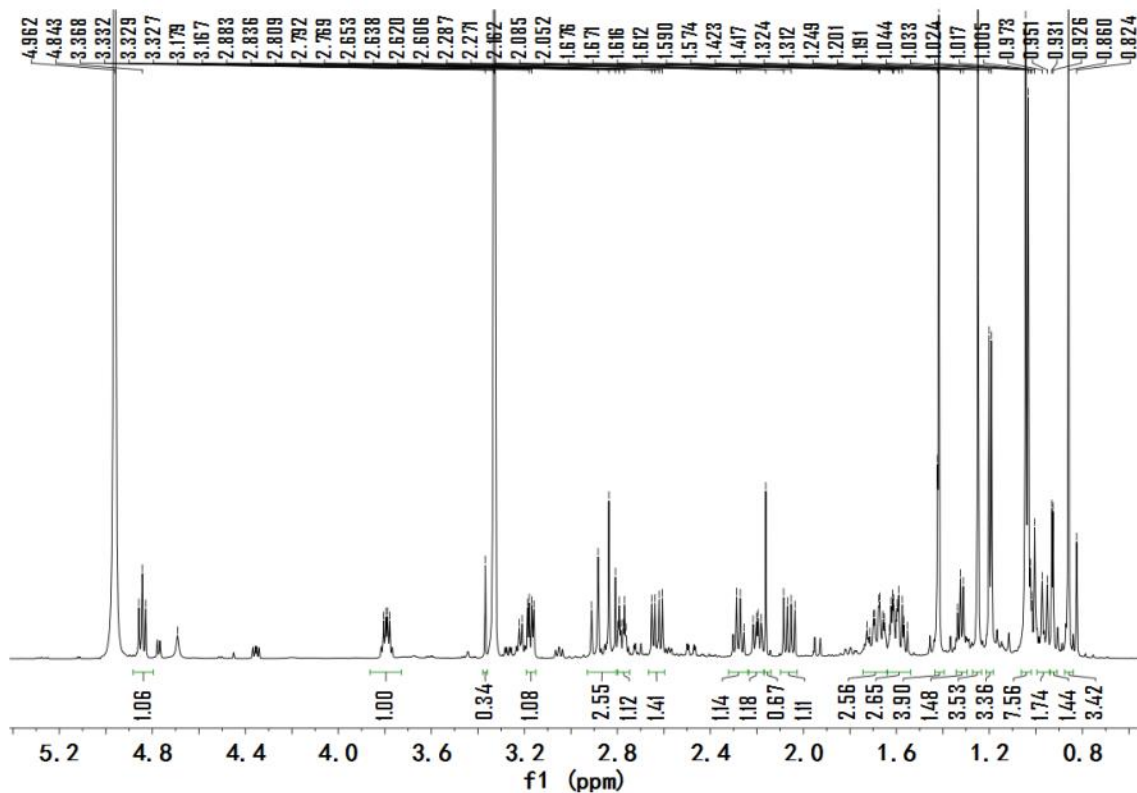

**Fig. S10**  $^1\text{H}$  NMR (600 MHz,  $\text{CD}_3\text{OD}$ ) spectrum of lucidone J (**2**)

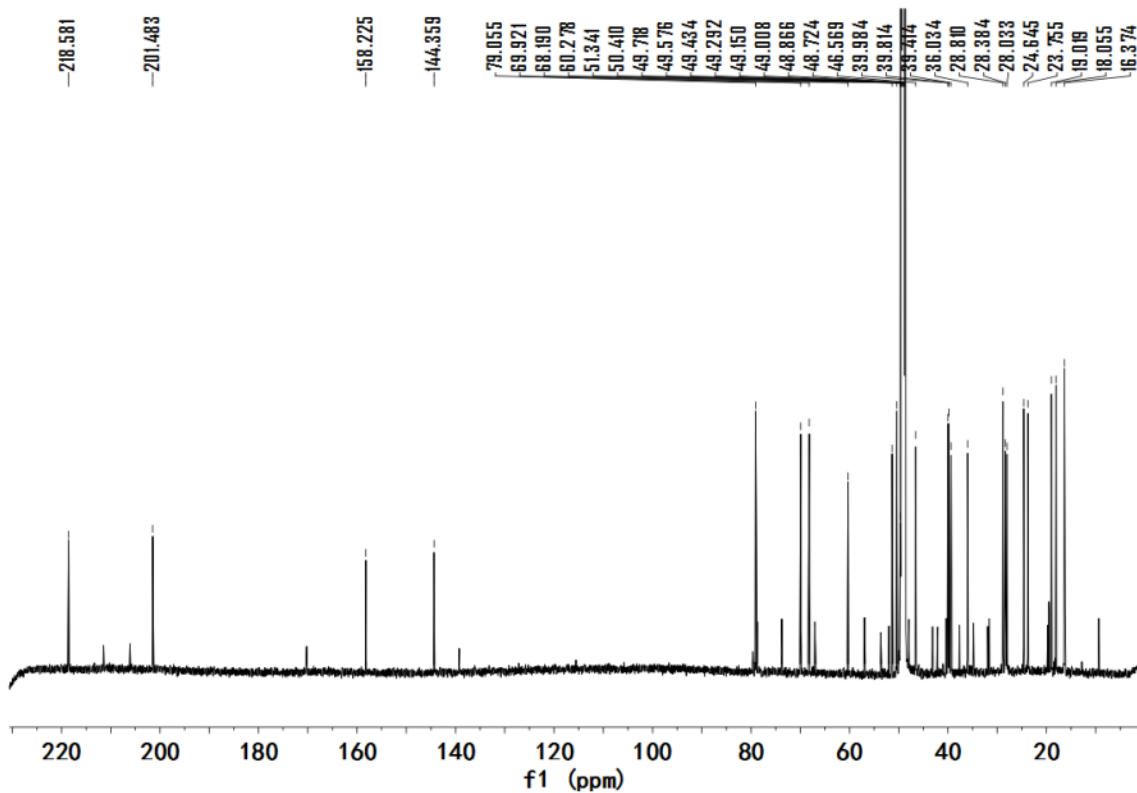

**Fig. S11**  $^{13}\text{C}$  NMR (150 MHz,  $\text{CD}_3\text{OD}$ ) spectrum of lucidone J (**2**)

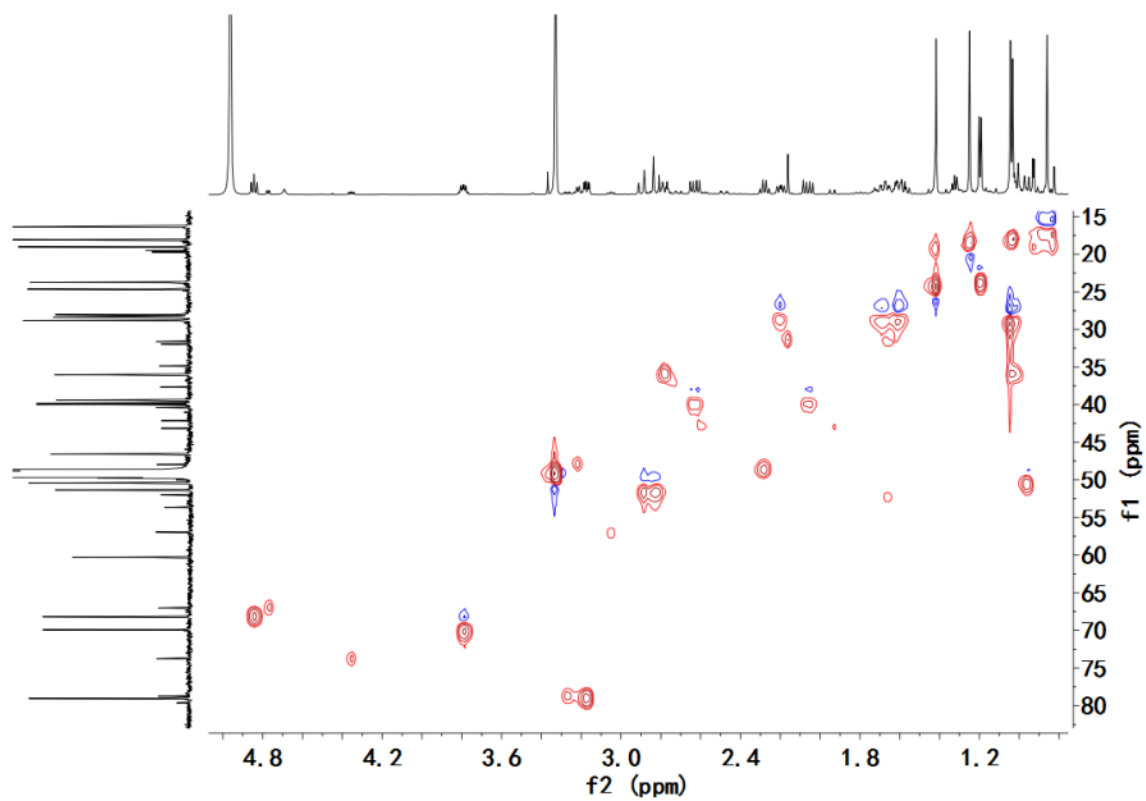

**Fig. S12** HSQC (600 MHz, CD<sub>3</sub>OD) spectrum of lucidone J (**2**)

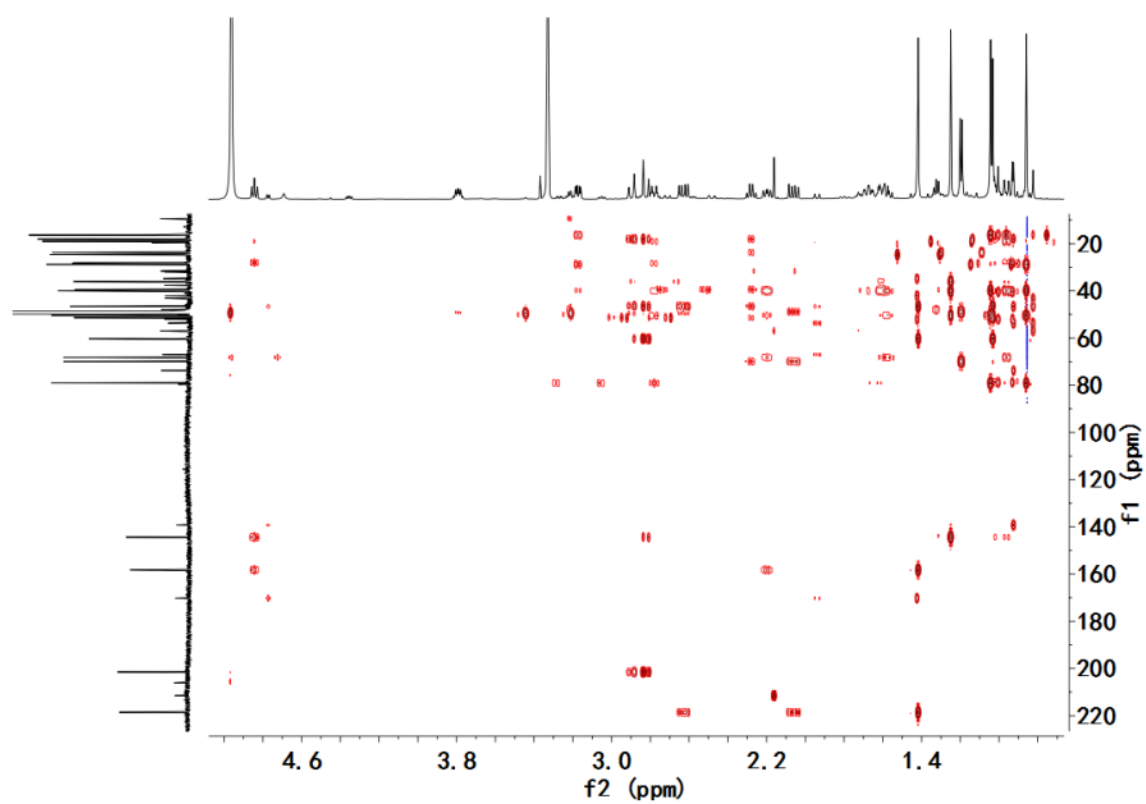

**Fig. S13** HMBC (600 MHz, CD<sub>3</sub>OD) spectrum of lucidone J (**2**)

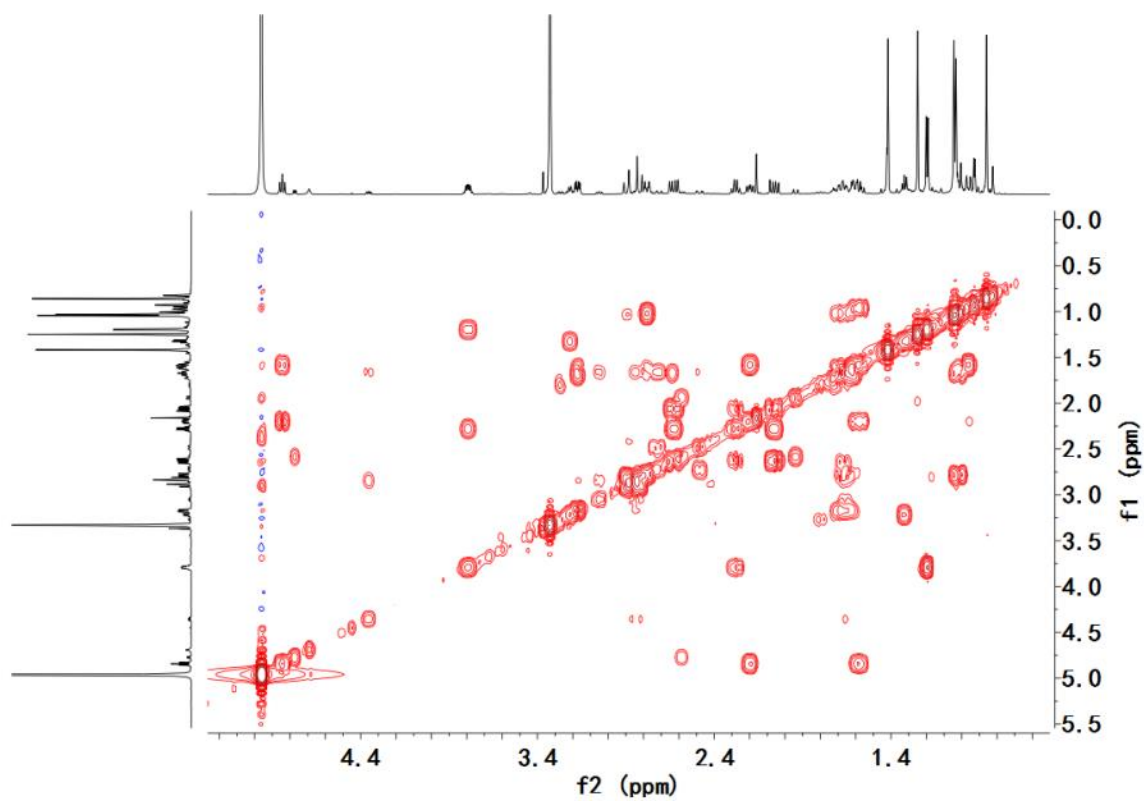

**Fig. S14**  $^1\text{H}$ - $^1\text{H}$  COSY (600 MHz,  $\text{CD}_3\text{OD}$ ) spectrum of lucidone J (**2**)

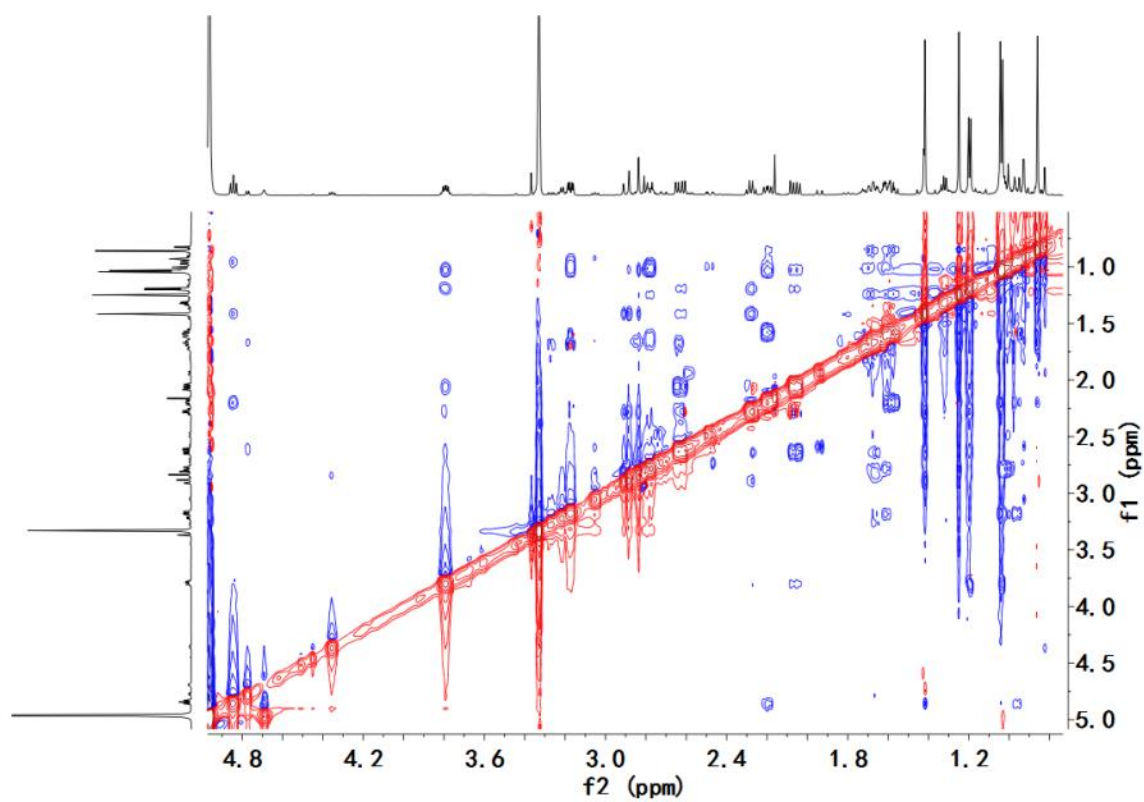

**Fig. S15** ROESY (600 MHz,  $\text{CD}_3\text{OD}$ ) spectrum of lucidone J (**2**)

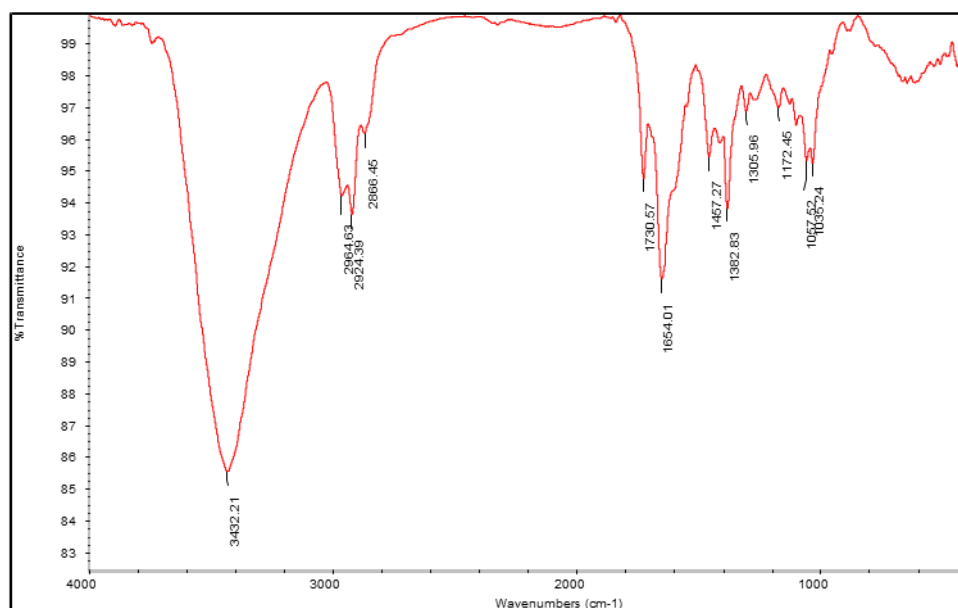

**Fig. S16** IR spectrum of lucidone J (2)

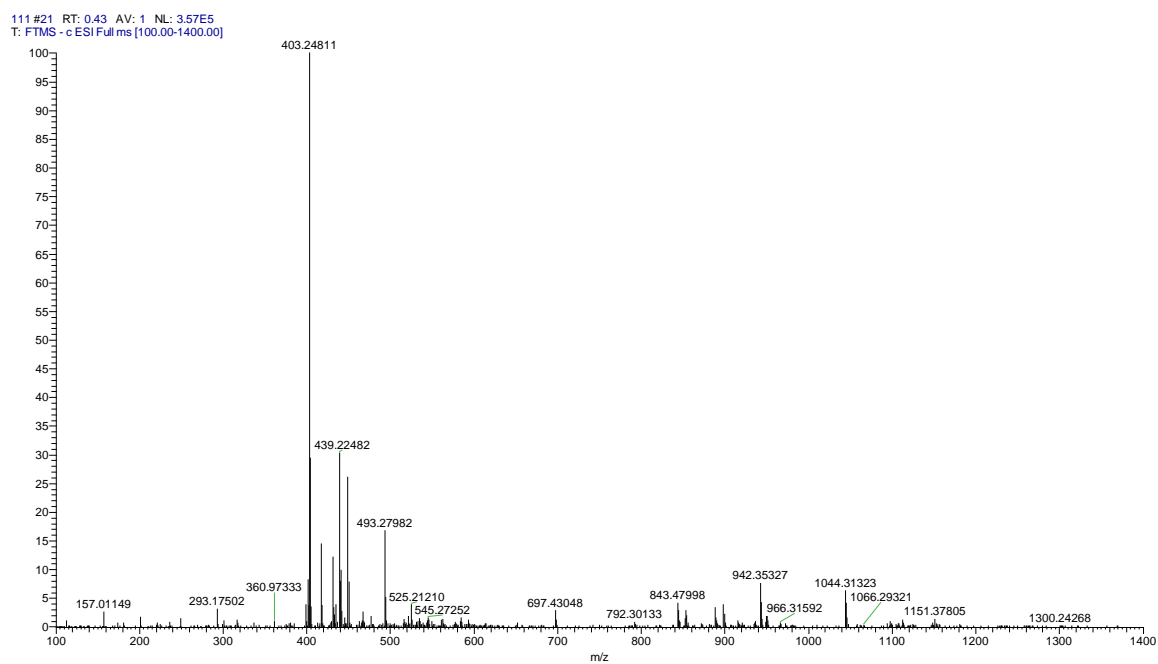

**Fig. S17** HRESIMS spectrum of lucidone J (2)

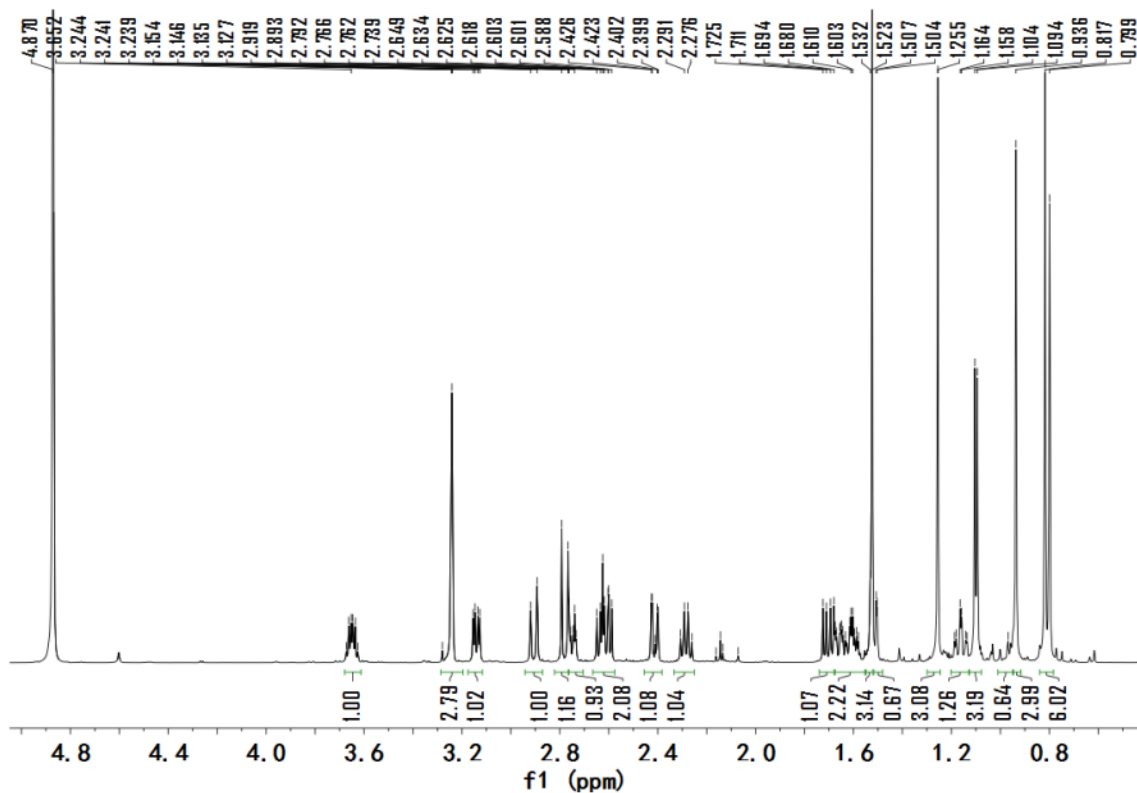

**Fig. S18** <sup>1</sup>H NMR (600 MHz, CD<sub>3</sub>OD) spectrum of lucidone K (**3**)

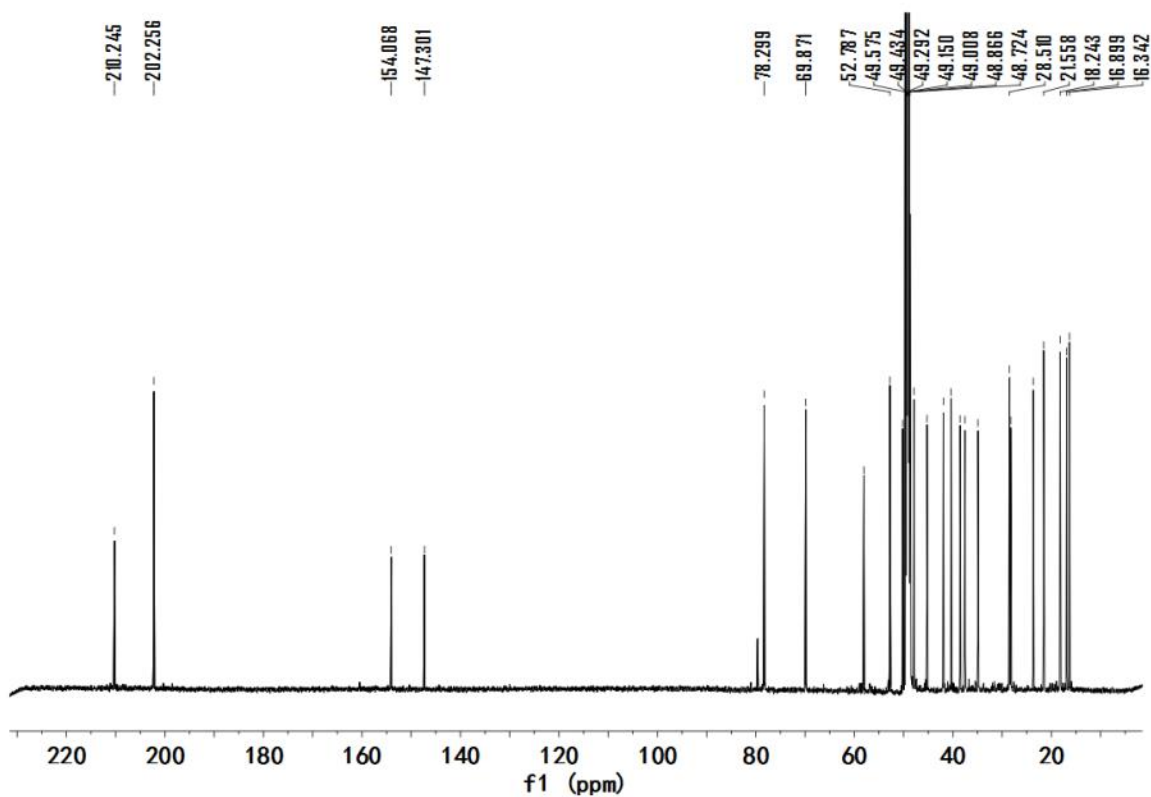

**Fig. S19** <sup>13</sup>C NMR (150 MHz, CD<sub>3</sub>OD) spectrum of lucidone K (**3**)

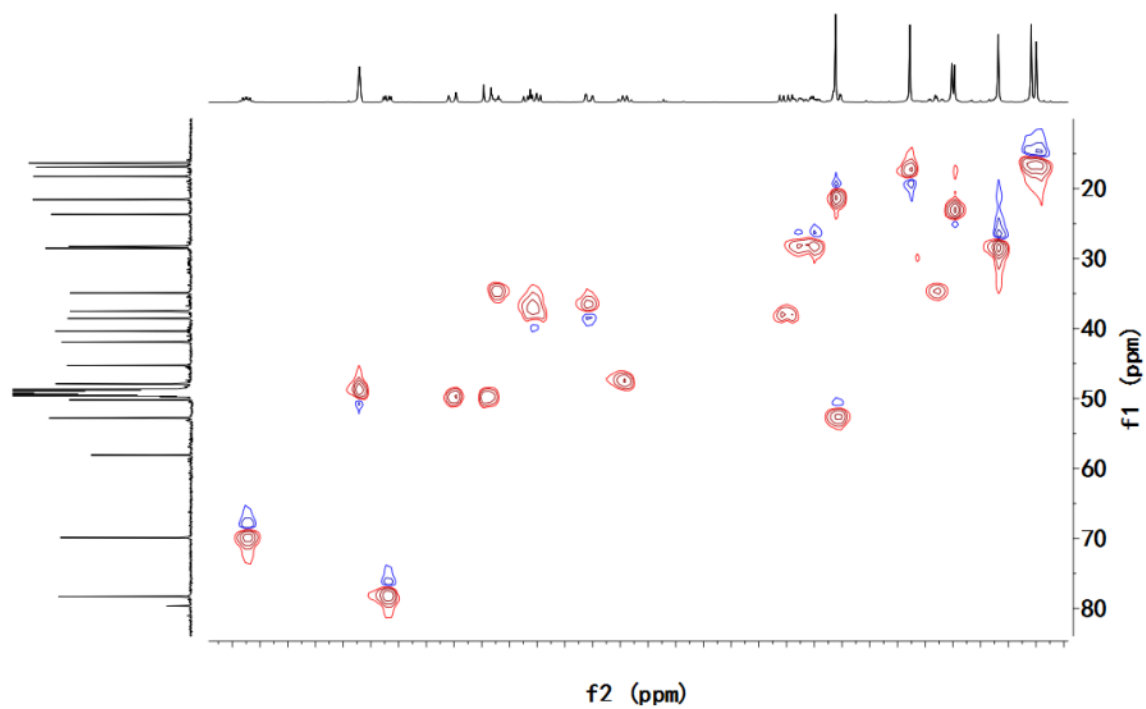

**Fig. S20** HSQC (600 MHz, CD<sub>3</sub>OD) spectrum of lucidone K (**3**)

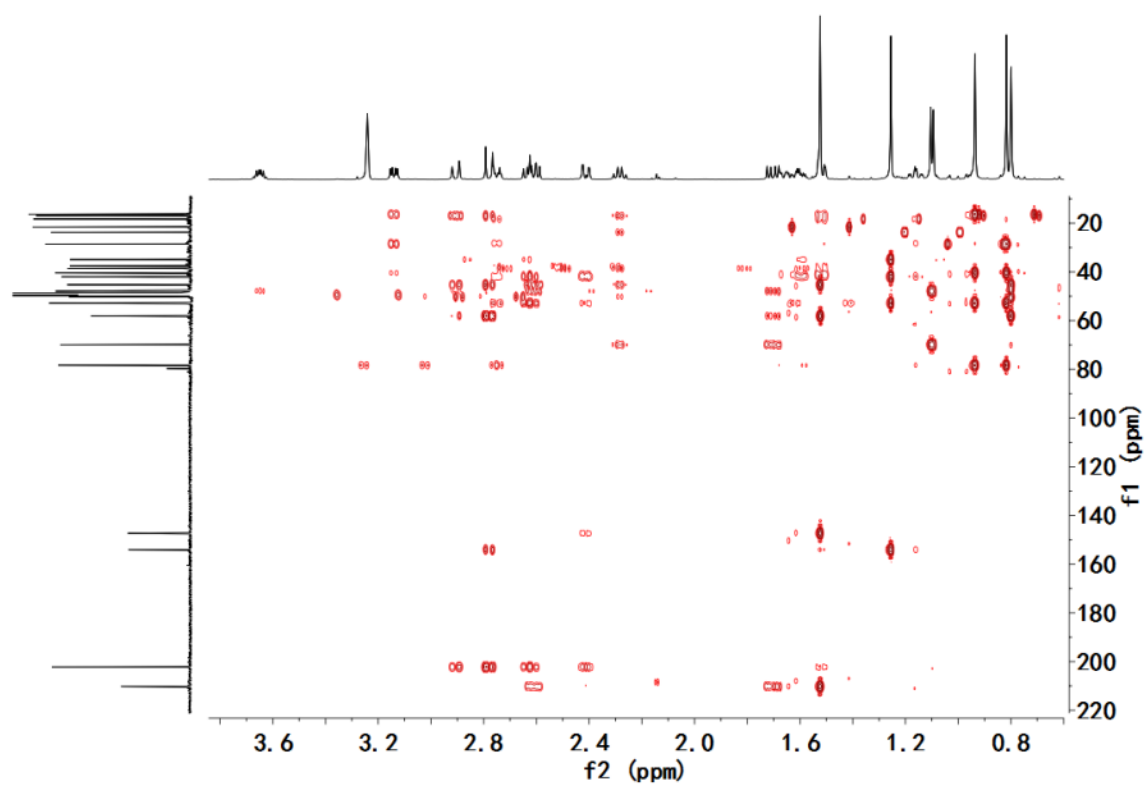

**Fig. S21** HMBC (600 MHz, CD<sub>3</sub>OD) spectrum of lucidone K (**3**)

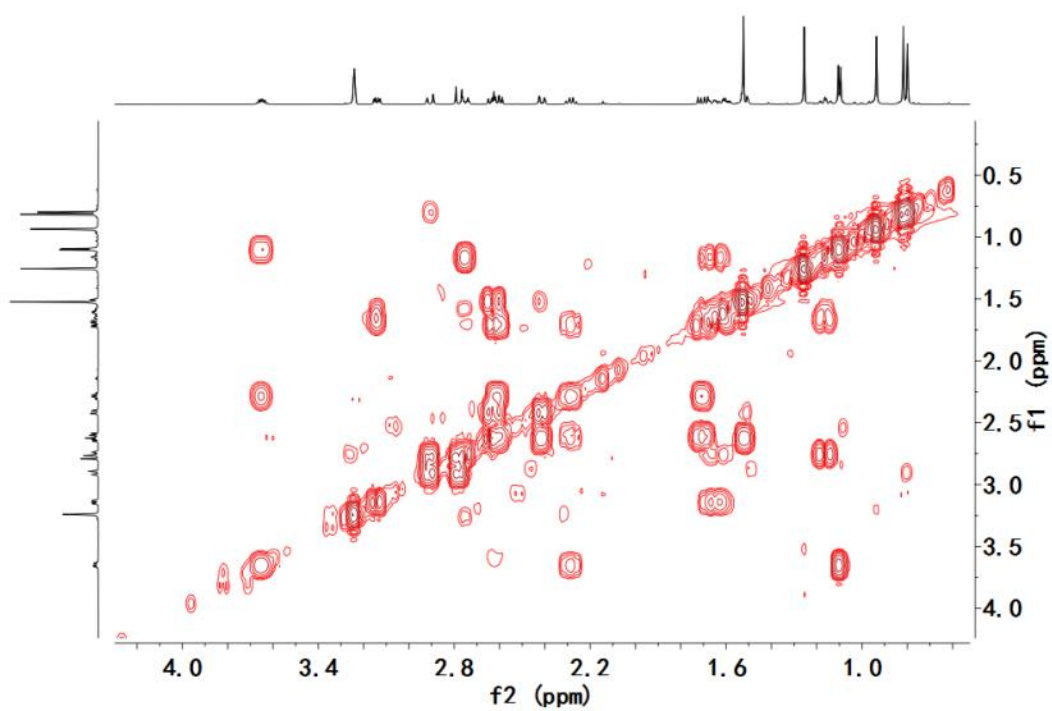

**Fig. S22**  $^1\text{H}$ - $^1\text{H}$  COSY (600 MHz,  $\text{CD}_3\text{OD}$ ) spectrum of lucidone K (3)

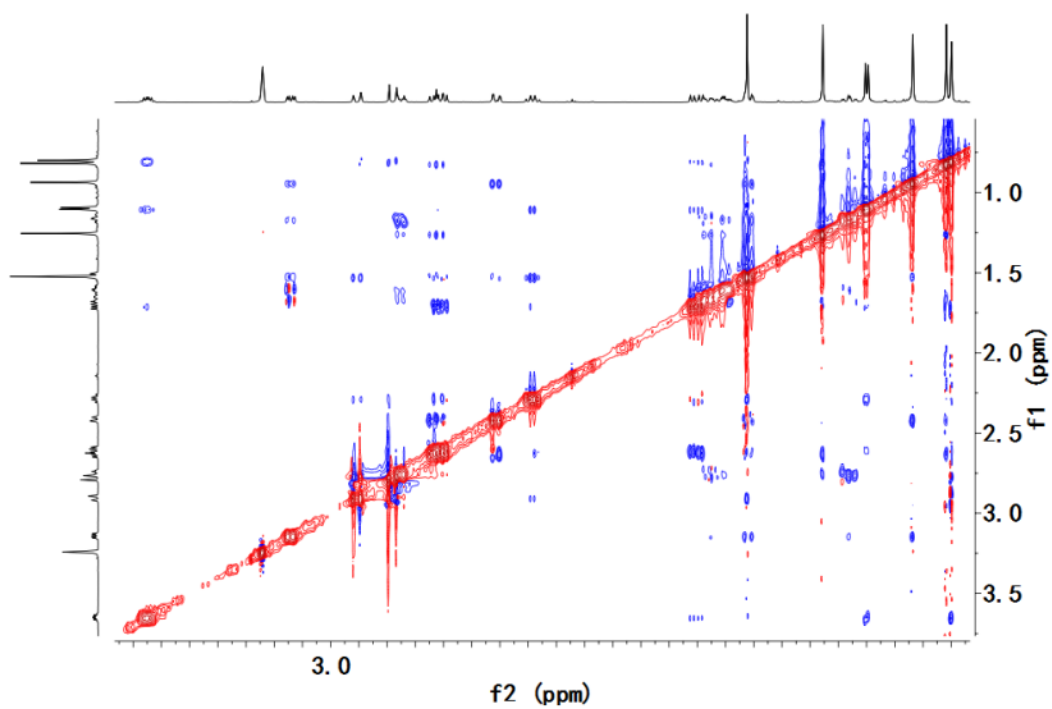

**Fig. S23** ROESY (600 MHz,  $\text{CD}_3\text{OD}$ ) spectrum of lucidone K (3)

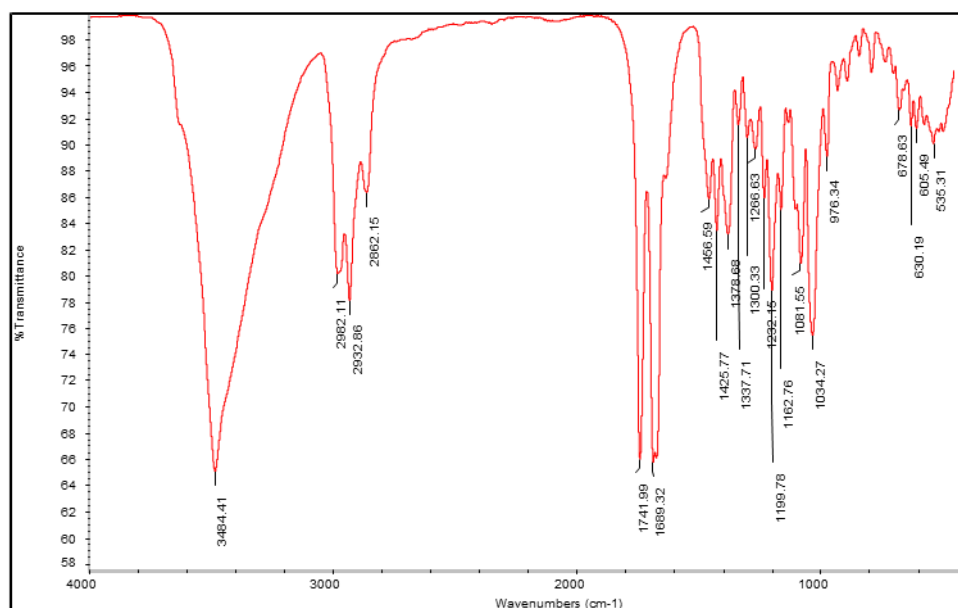

**Fig. S24** IR spectrum of lucidone K (3)

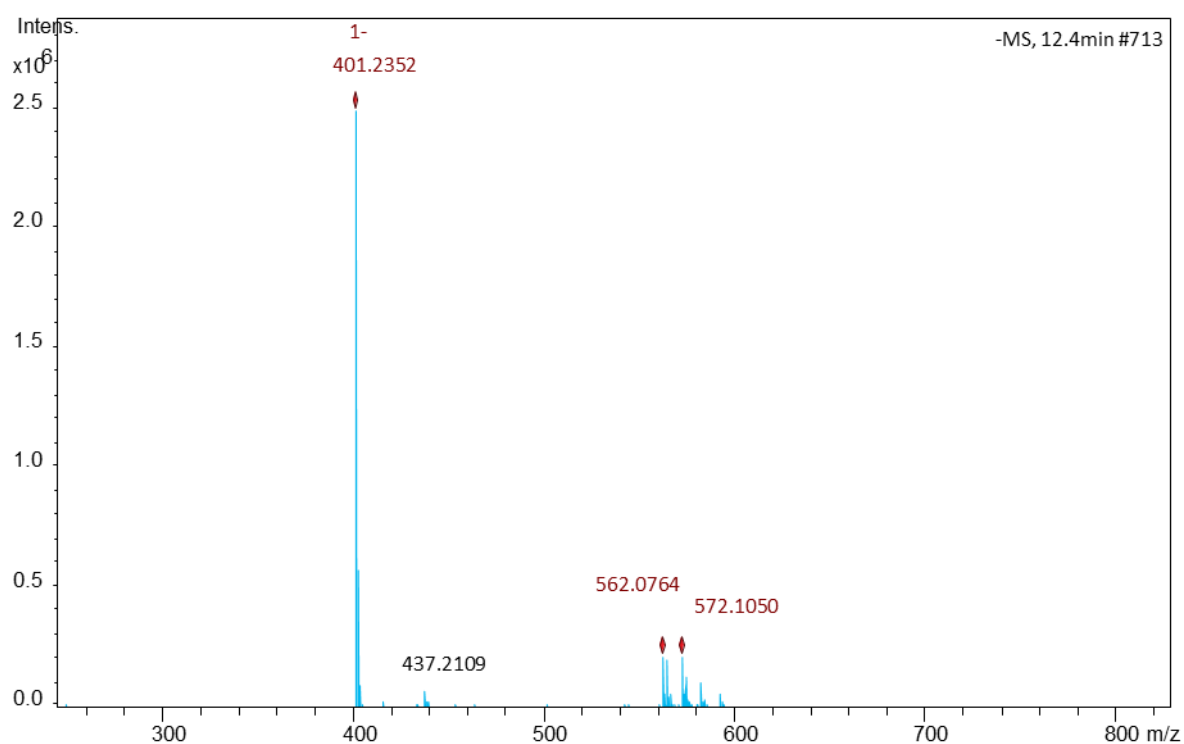

**Fig. S25** HRESIMS spectrum of lucidone K (3)



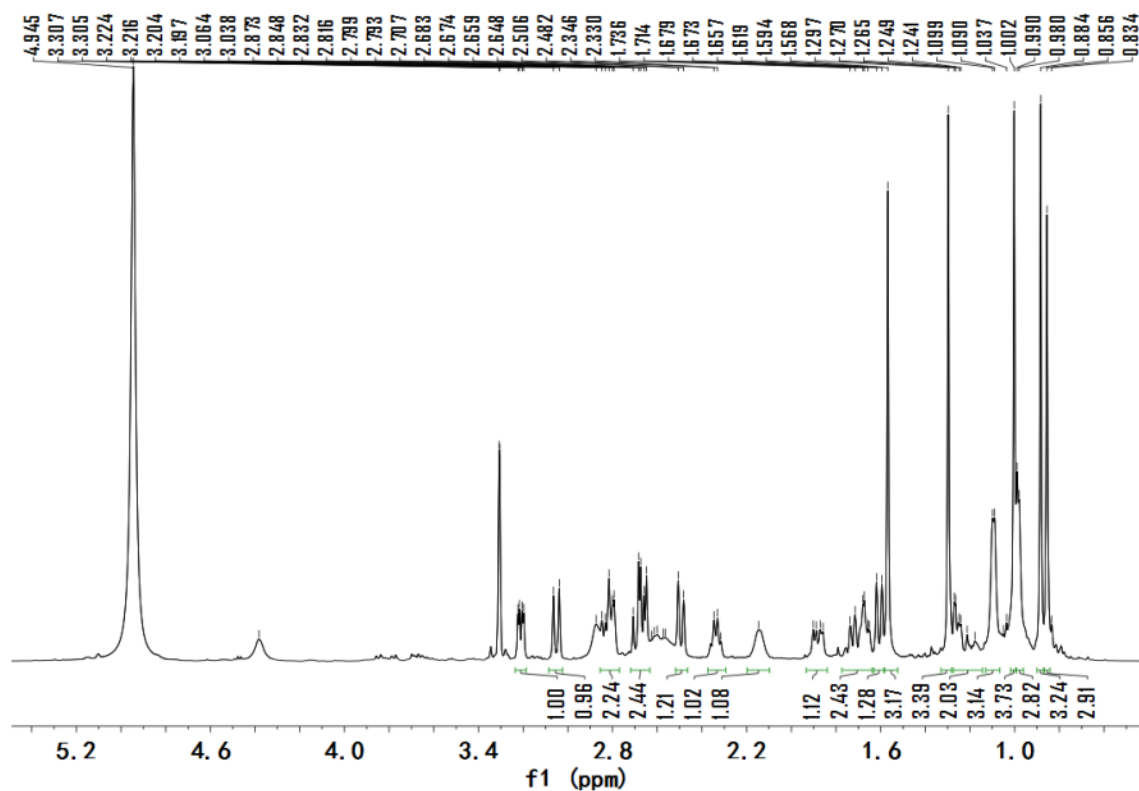

**Fig. S26** <sup>1</sup>H NMR (600 MHz, CD<sub>3</sub>OD) spectrum of lucidone L (**4**)

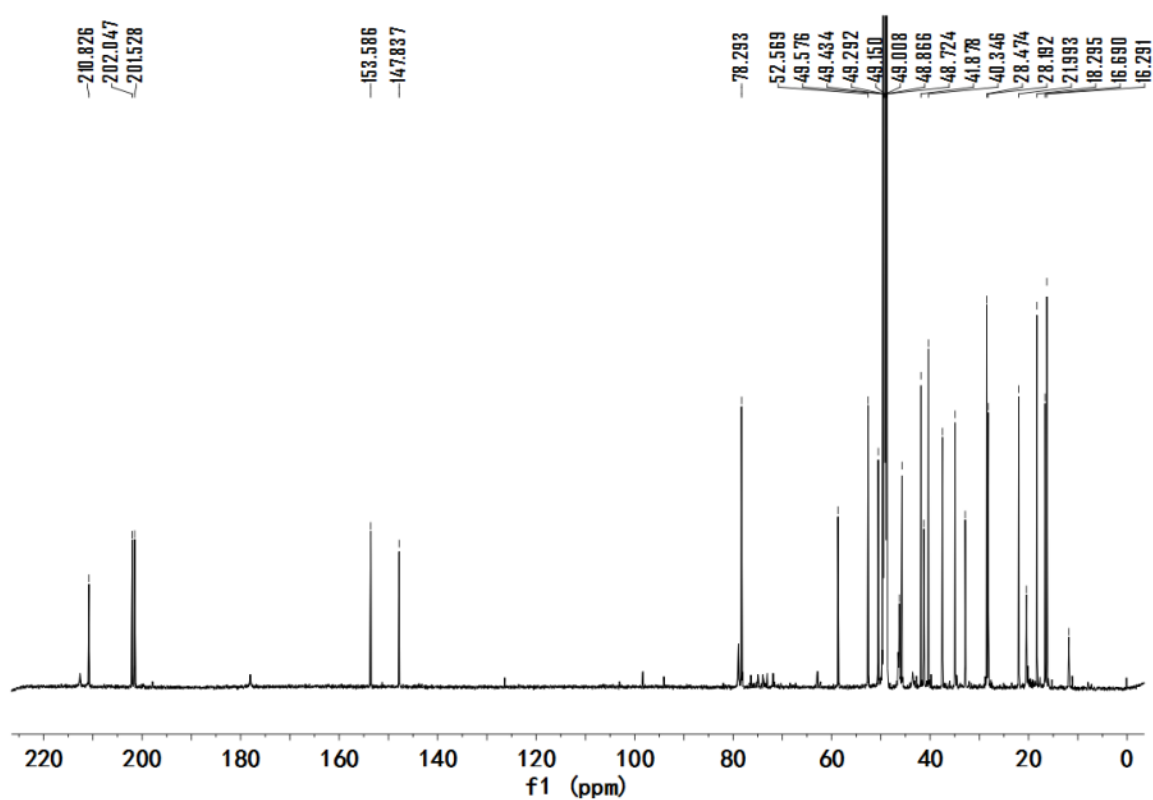

**Fig. S27** <sup>13</sup>C NMR (150 MHz, CD<sub>3</sub>OD) spectrum of lucidone L (**4**)

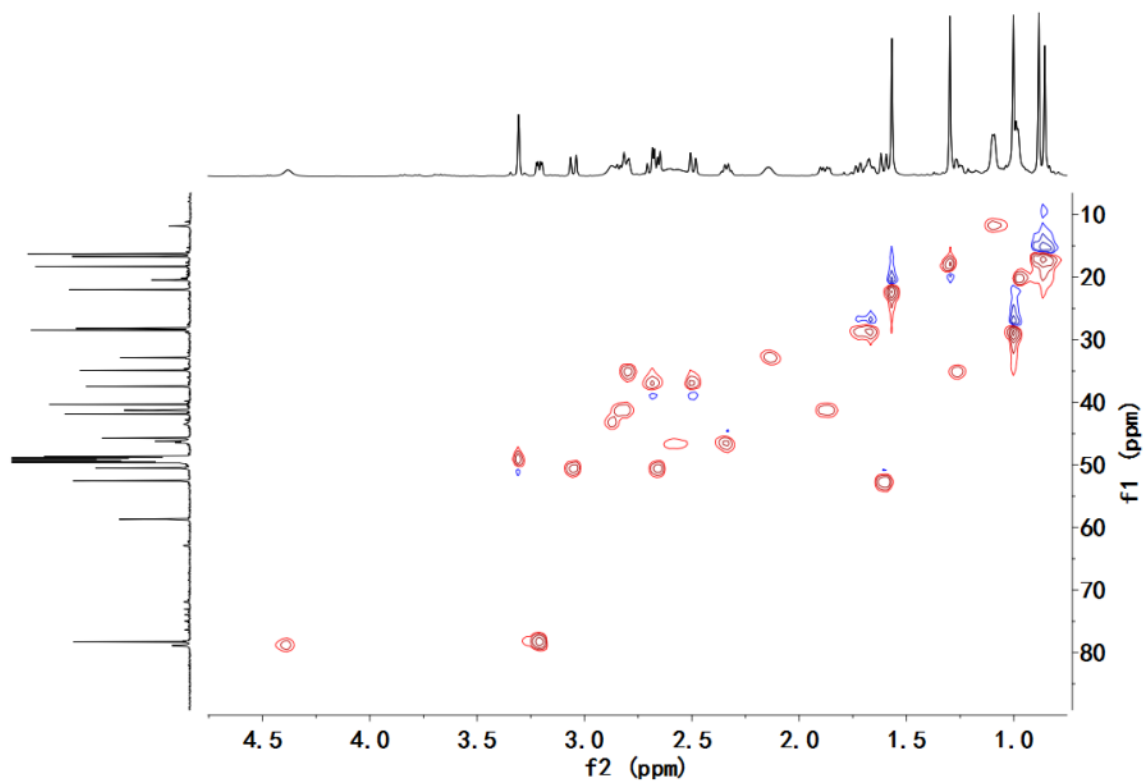

**Fig. S28** HSQC (600 MHz, CD<sub>3</sub>OD) spectrum of lucidone L (**4**)

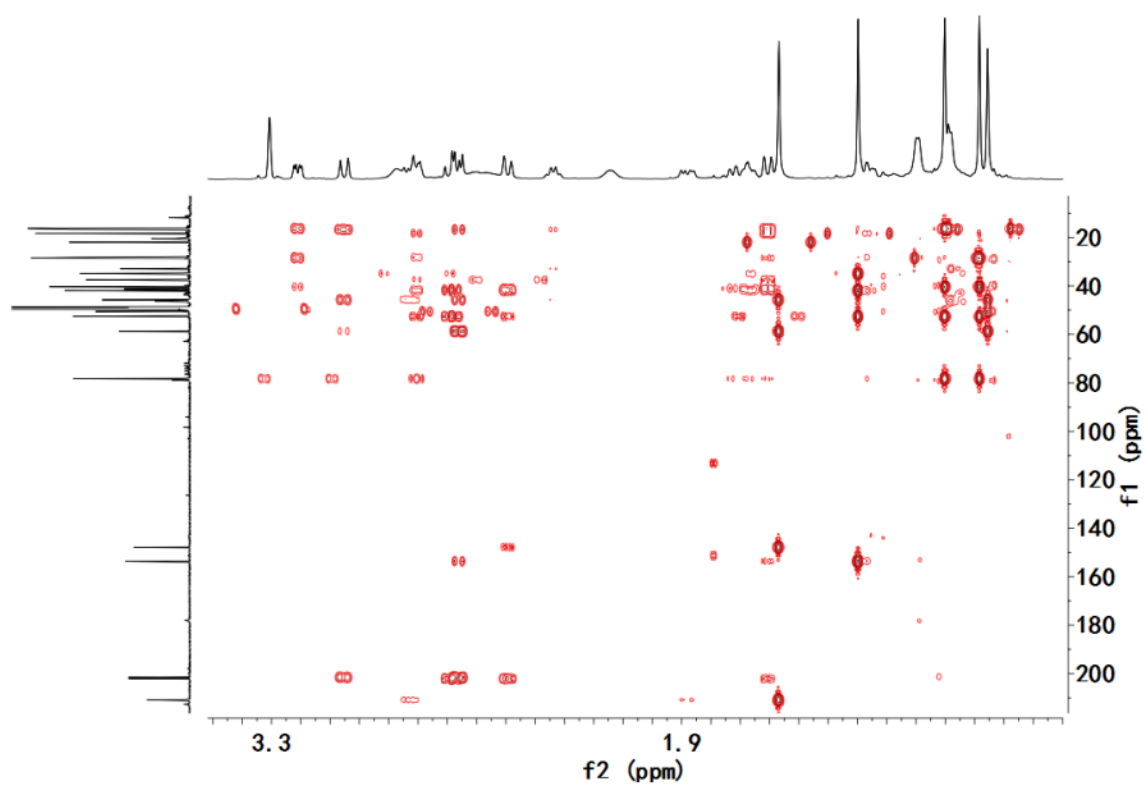

**Fig. S29** HMBC (600 MHz, CD<sub>3</sub>OD) spectrum of lucidone L (**4**)

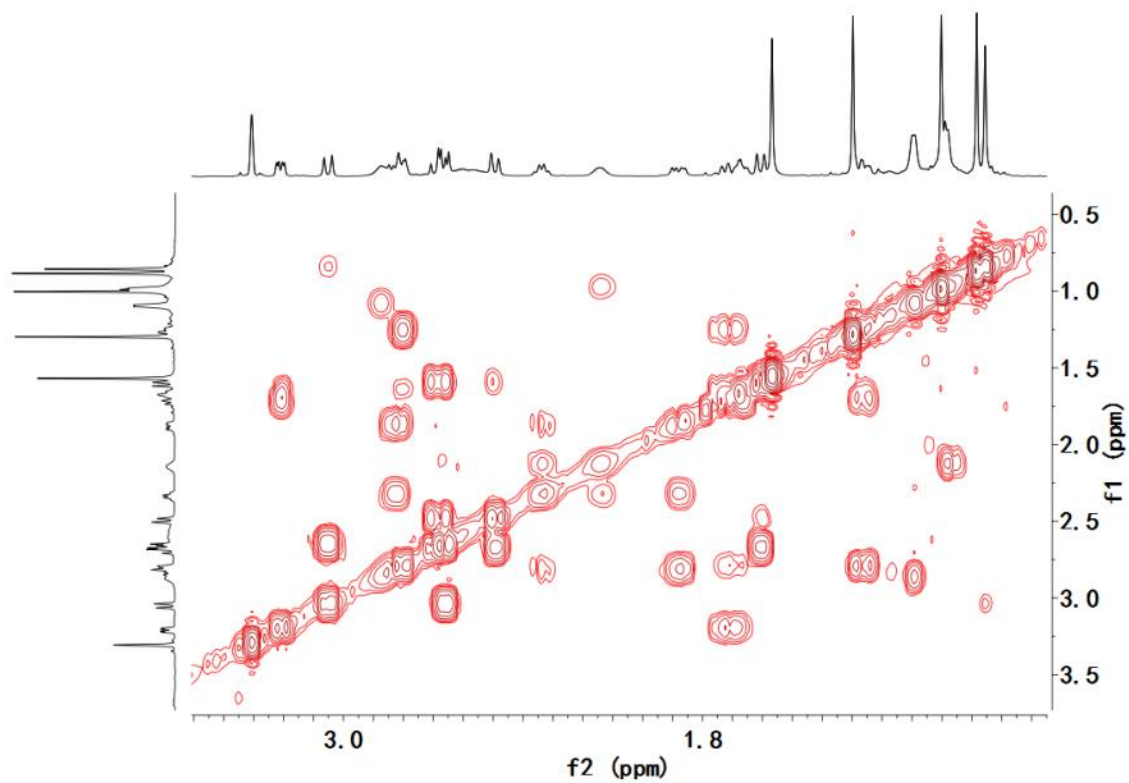

**Fig. S30**  $^1\text{H}$ - $^1\text{H}$  COSY (600 MHz,  $\text{CD}_3\text{OD}$ ) spectrum of lucidone L (4)

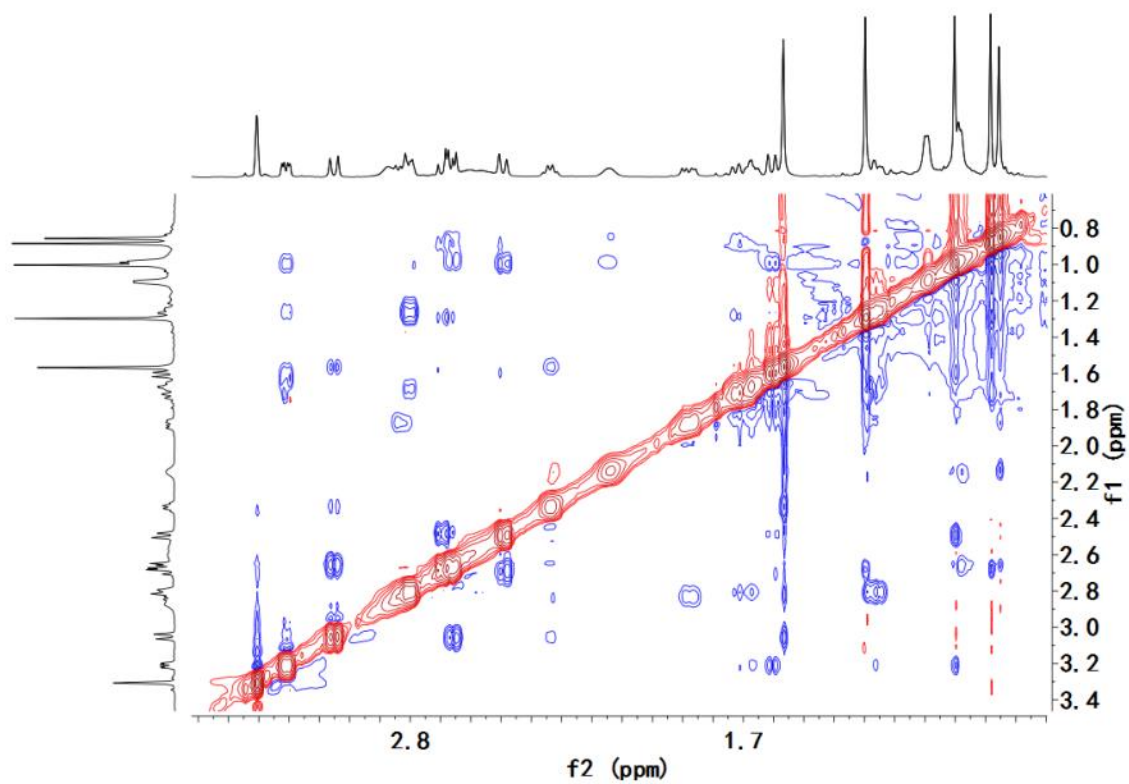

**Fig. S31** ROESY (600 MHz,  $\text{CD}_3\text{OD}$ ) spectrum of lucidone L (4)

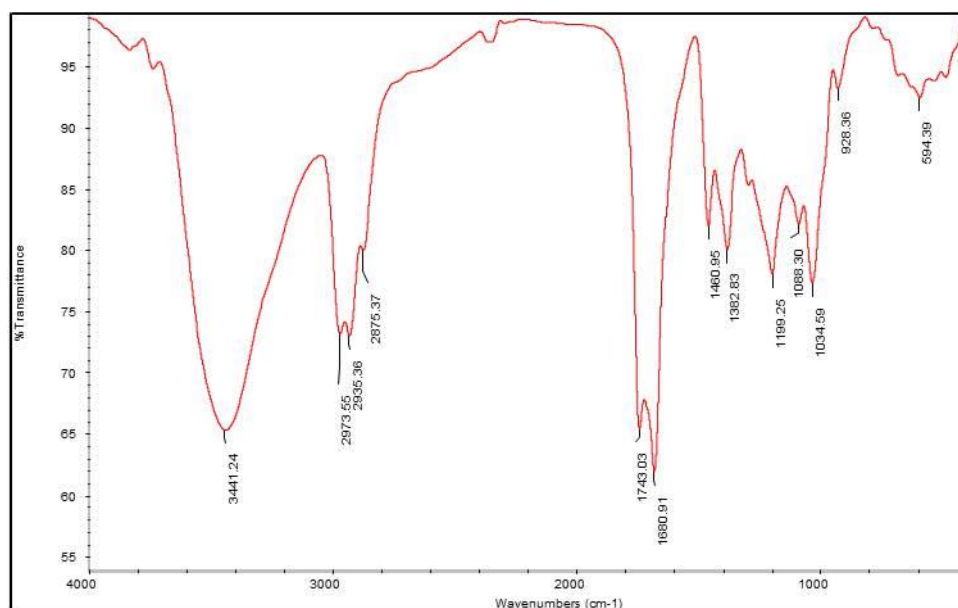

**Fig. S32** IR spectrum of lucidone L (4)

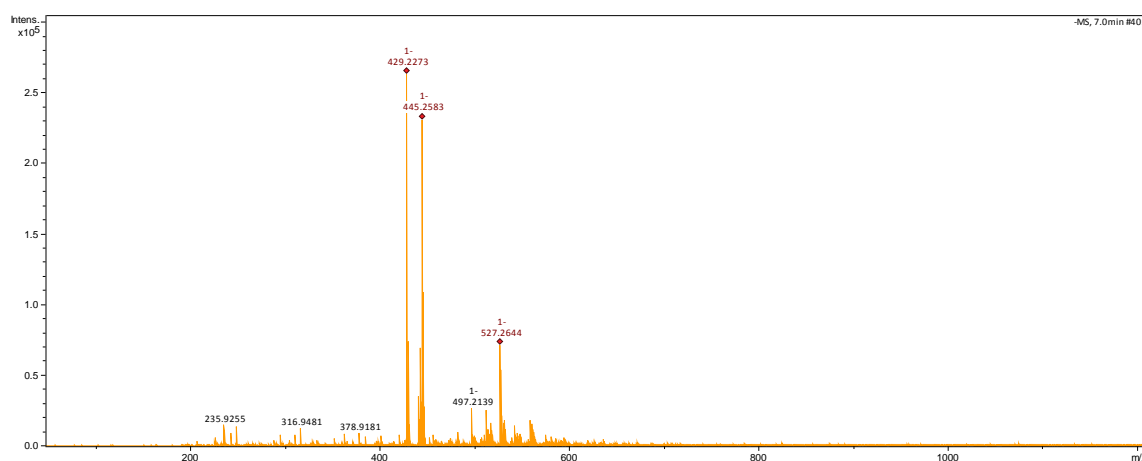

**Fig. S33** HRESIMS spectrum of lucidone L (4)

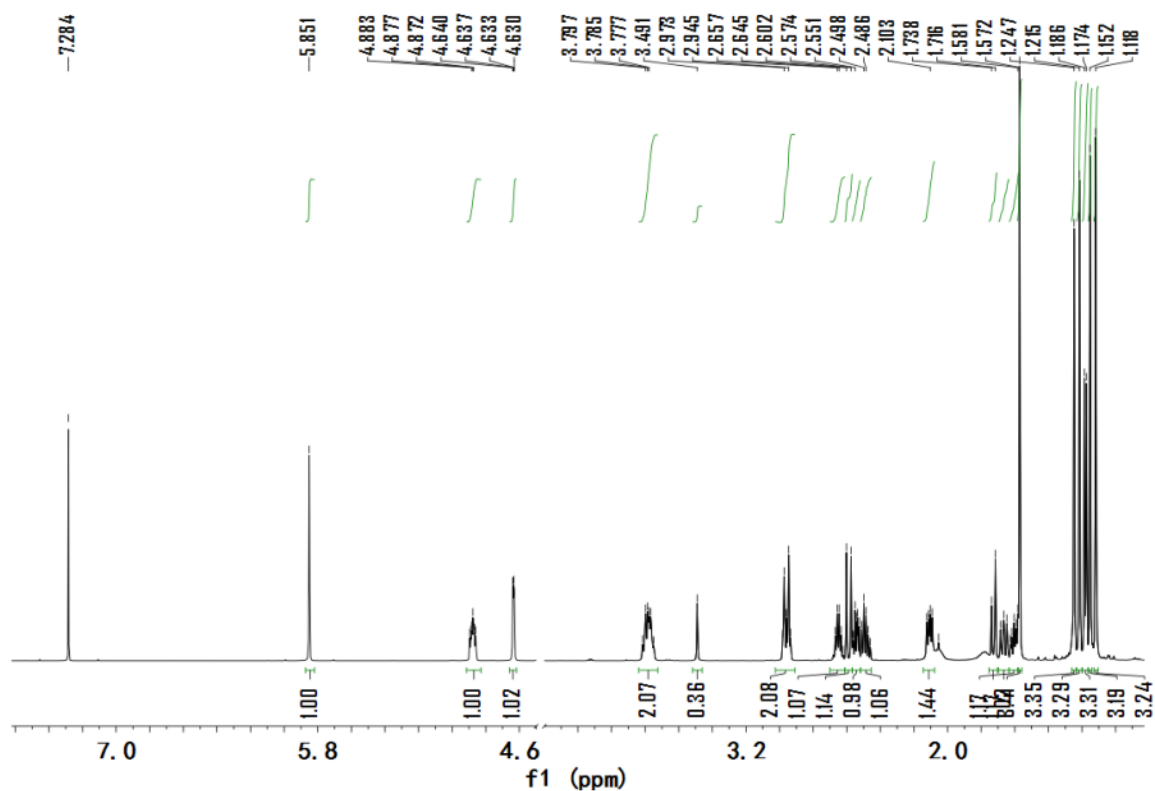

**Fig. S34**  $^1\text{H}$  NMR (600 MHz,  $\text{CDCl}_3$ ) spectrum of ganosineniol B (**5**)

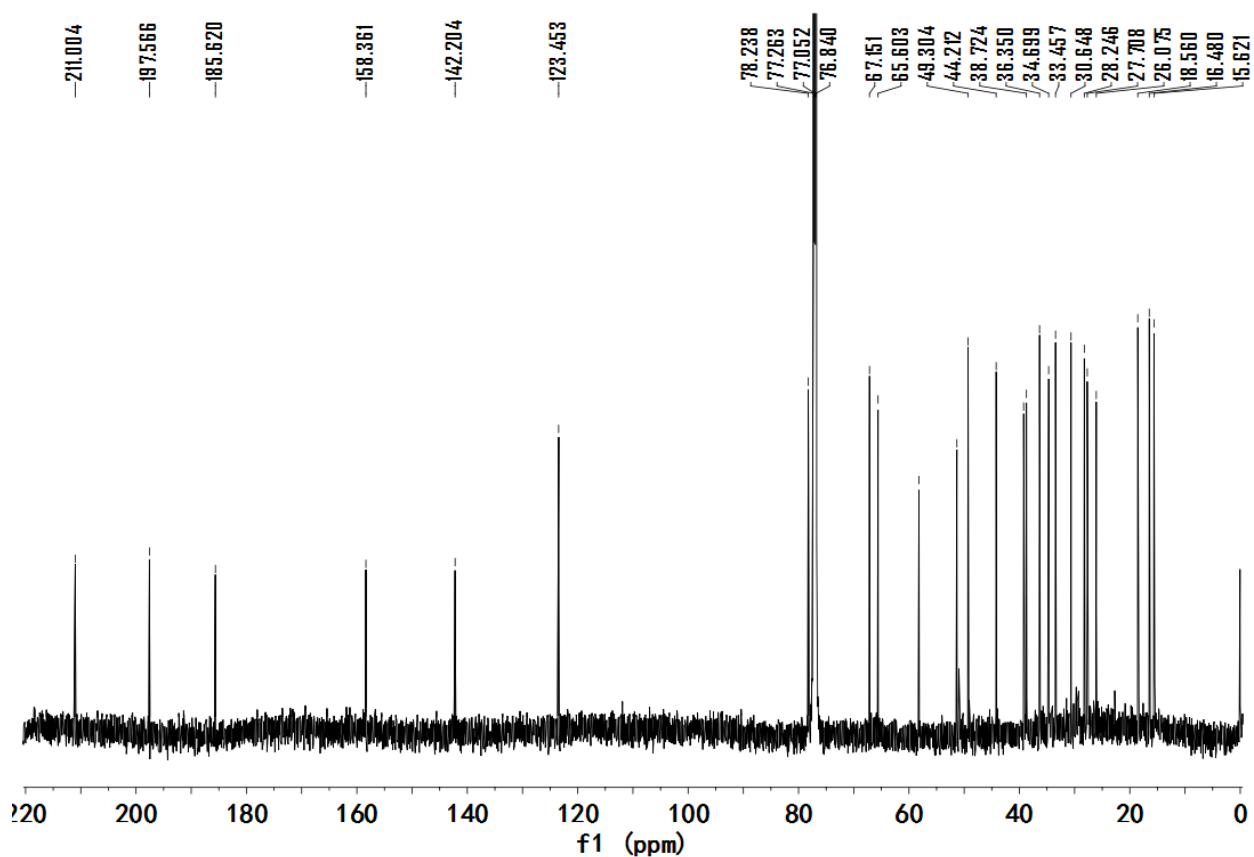

**Fig. S35**  $^{13}\text{C}$  NMR (150 MHz,  $\text{CDCl}_3$ ) spectrum of ganosineniol B (**5**)

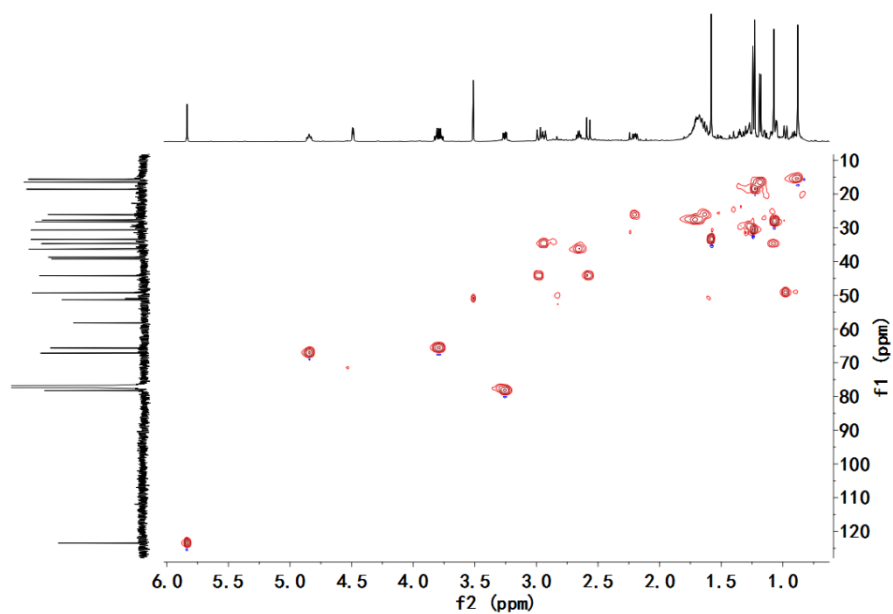

**Fig. S36** HSQC (600 MHz, CDCl<sub>3</sub>) spectrum of ganosineniol B (**5**)

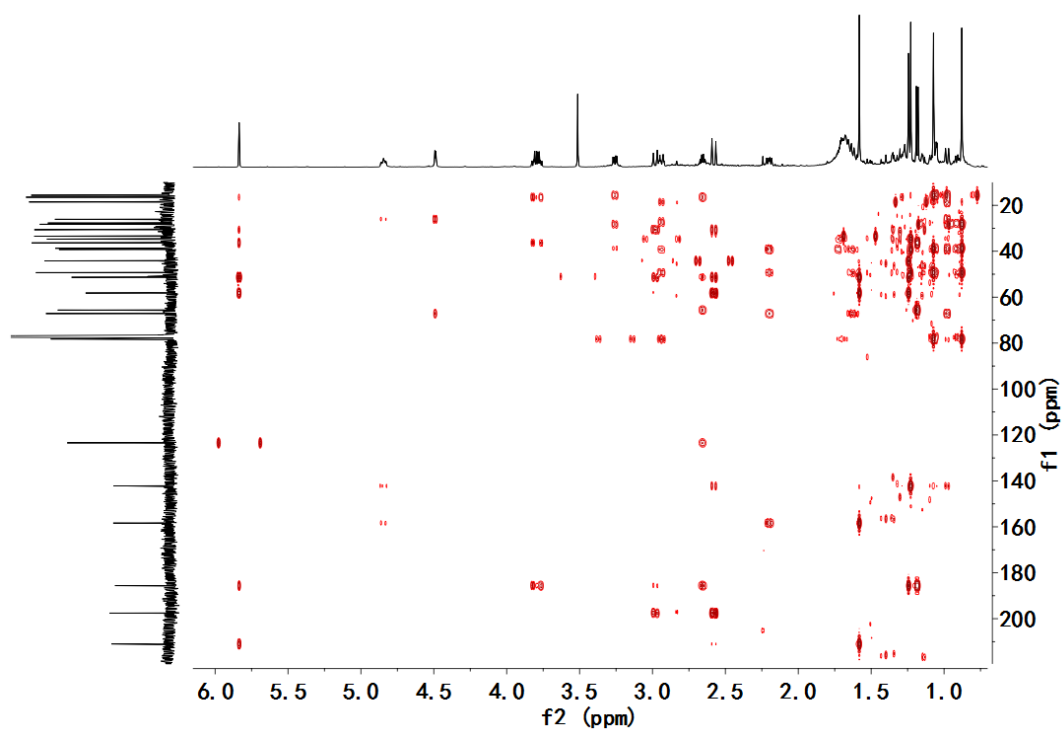

**Fig. S37** HMBC (600 MHz, CDCl<sub>3</sub>) spectrum of ganosineniol B (**5**)

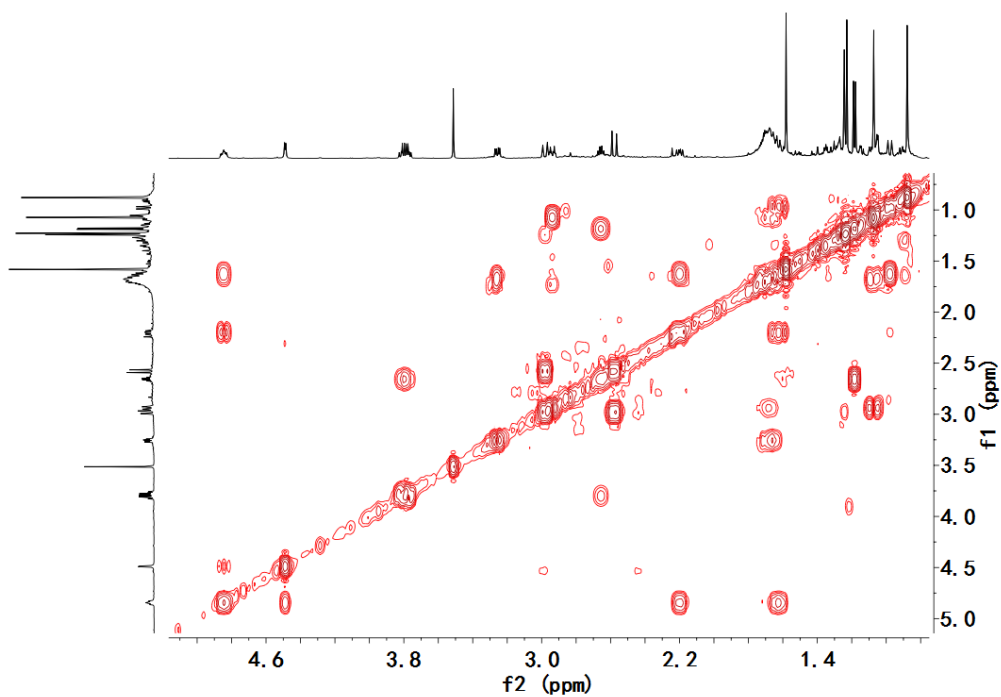

**Fig. S38**  $^1\text{H}$ - $^1\text{H}$  COSY (600 MHz,  $\text{CDCl}_3$ ) spectrum of ganosineniol B (5)

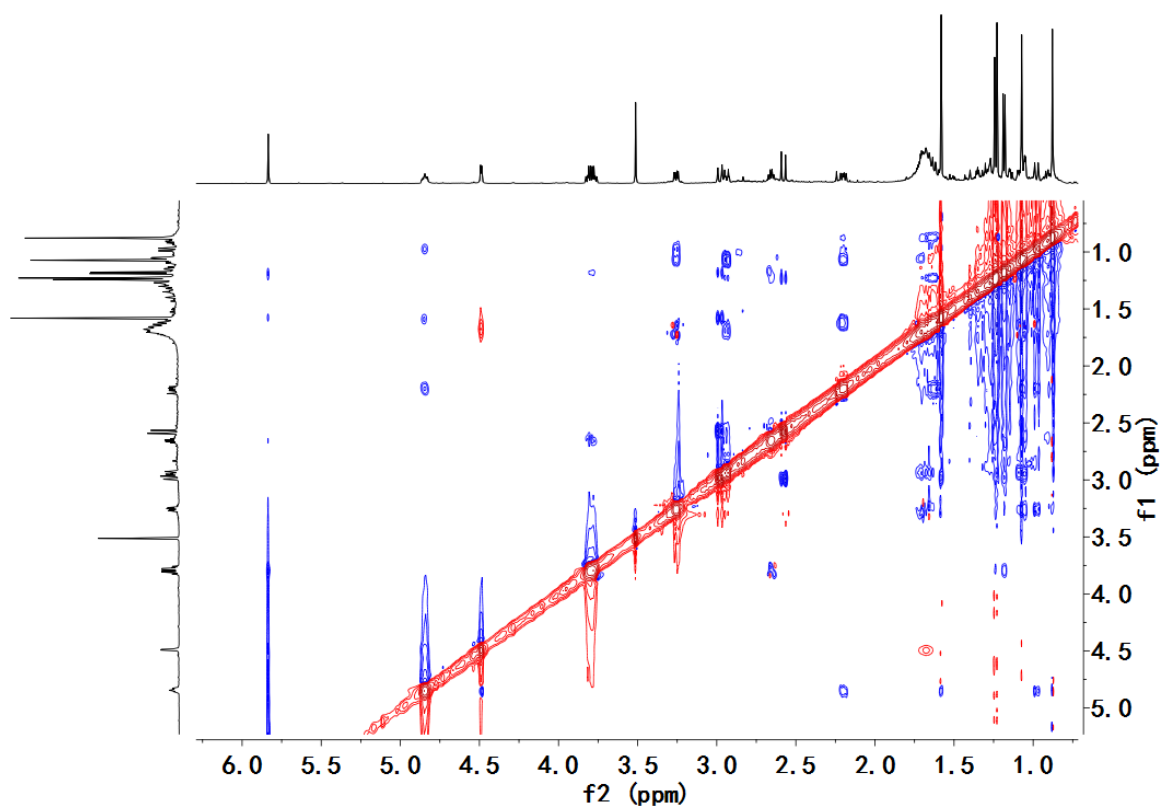

**Fig. S39** ROESY (600 MHz,  $\text{CDCl}_3$ ) spectrum of ganosineniol B (5)

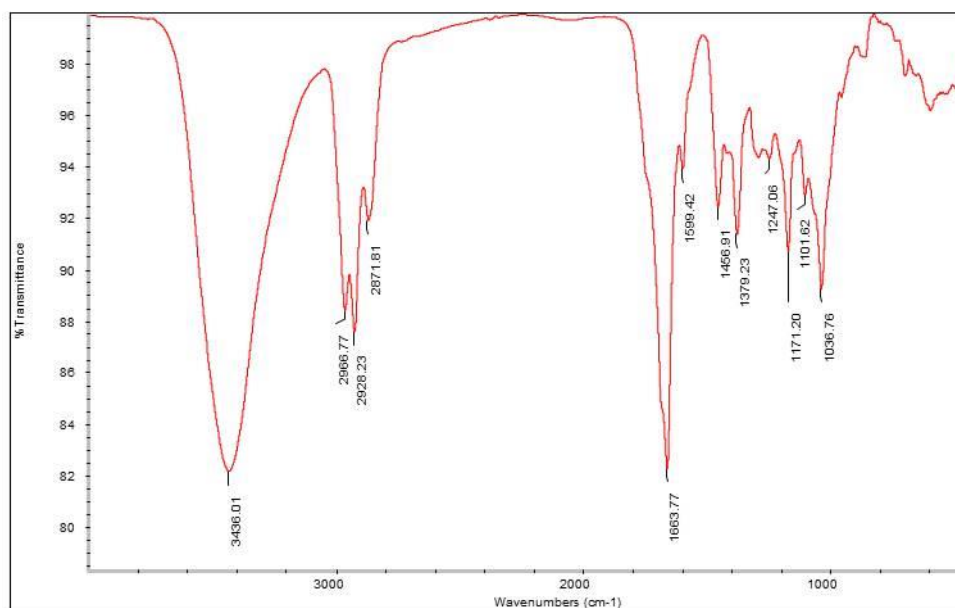

**Fig. S40** IR spectrum of ganosineniol B (5)

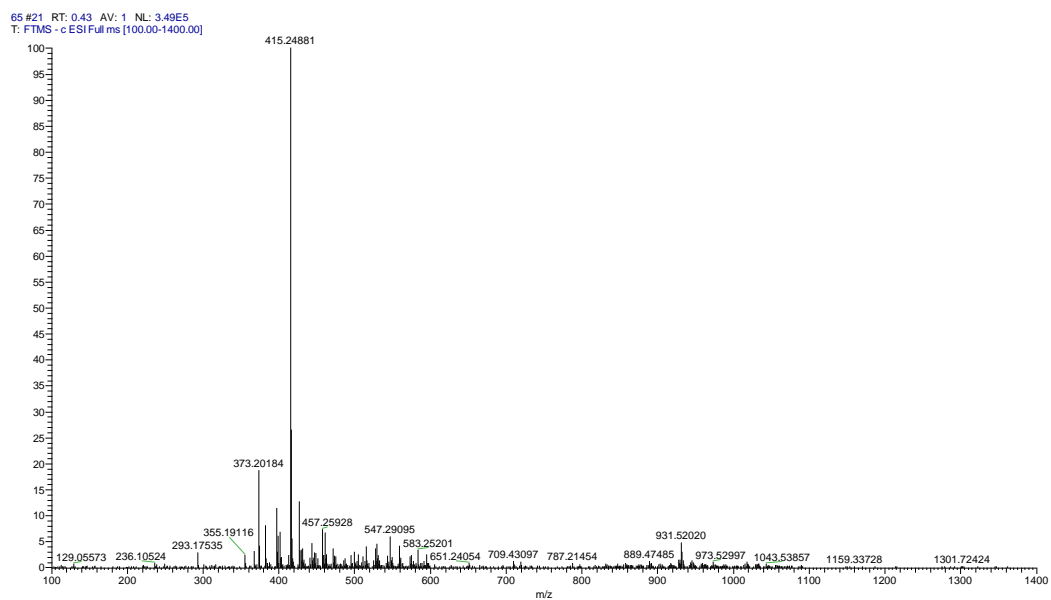

**Fig. S41** HRESIMS spectrum of ganosineniol B (5)



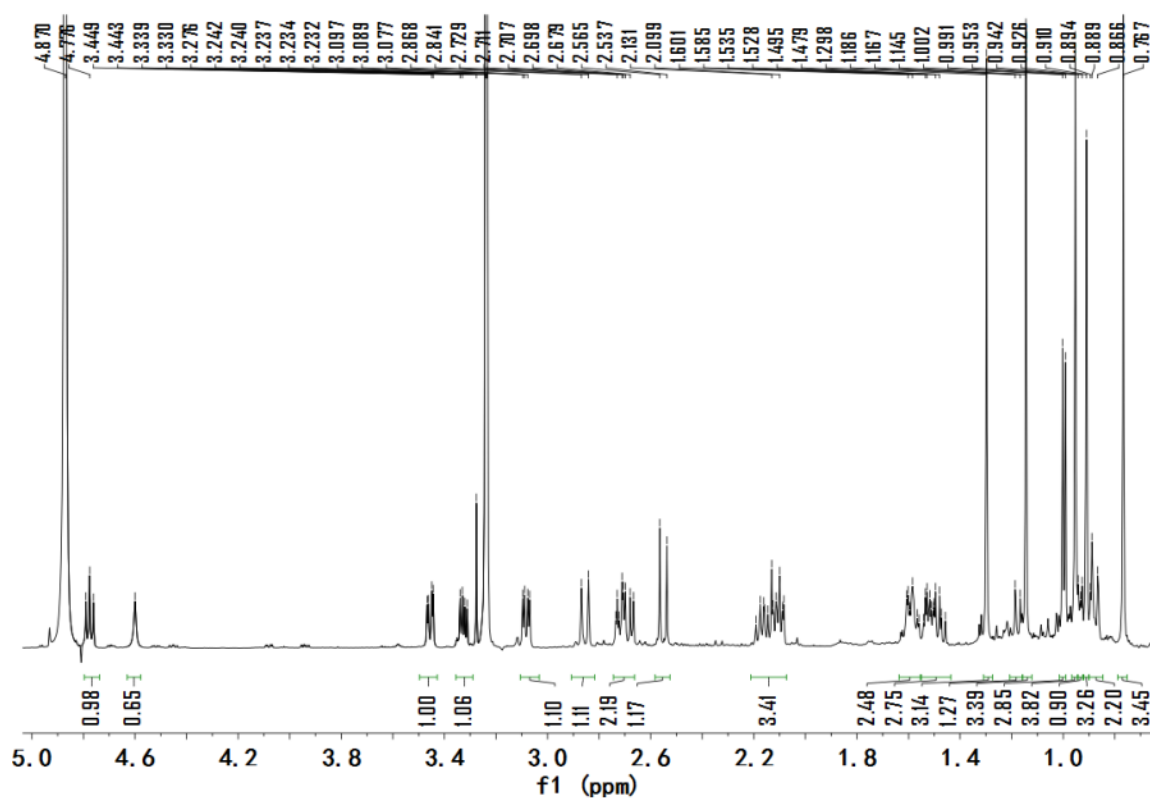

Fig. S42  $^1\text{H}$  NMR (600 MHz,  $\text{CD}_3\text{OD}$ ) spectrum of ganosineniol C (**6**)

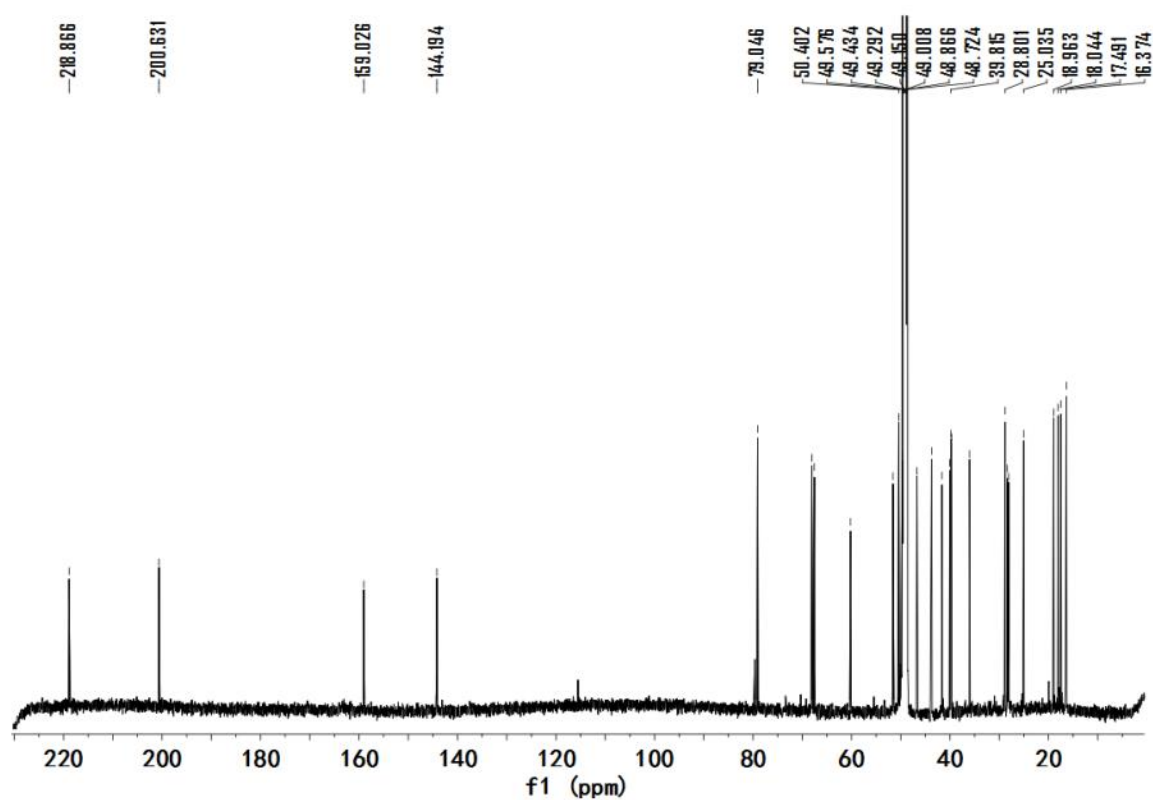

Fig. S43  $^{13}\text{C}$  NMR (150 MHz,  $\text{CD}_3\text{OD}$ ) spectrum of ganosineniol C (**6**)

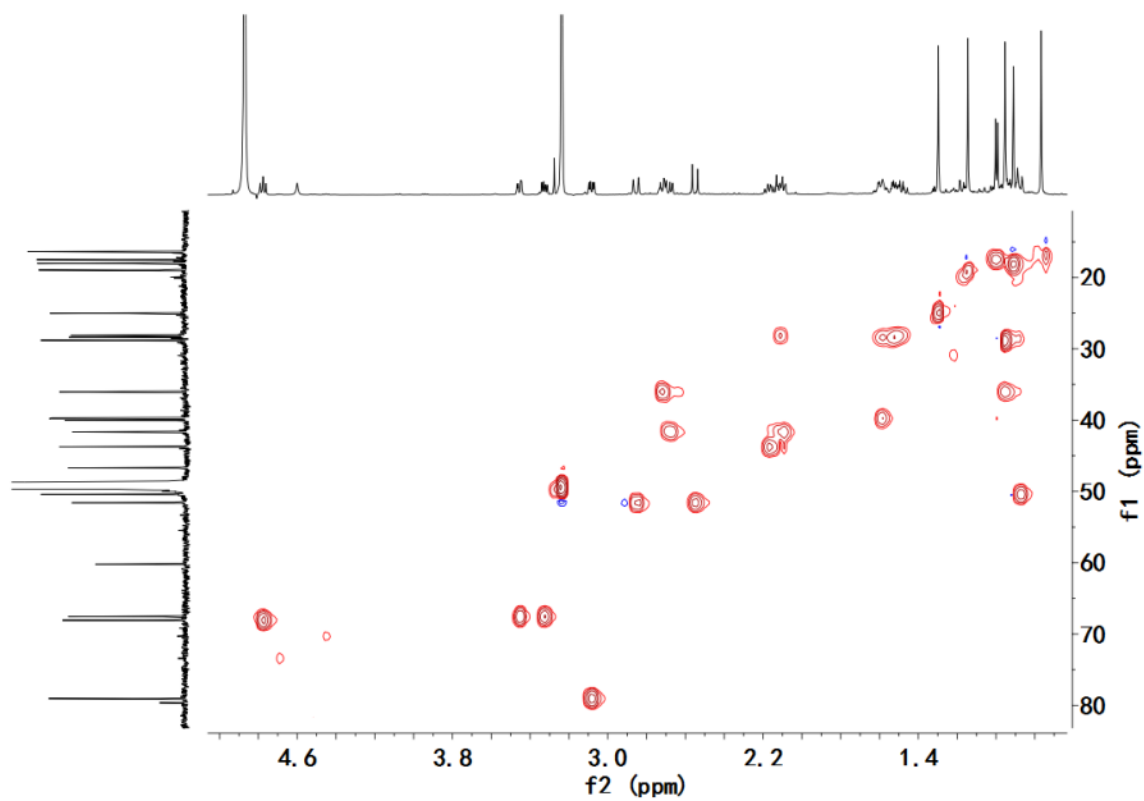

**Fig. S44** HSQC (600 MHz, CD<sub>3</sub>OD) spectrum of ganosineniol C (6)

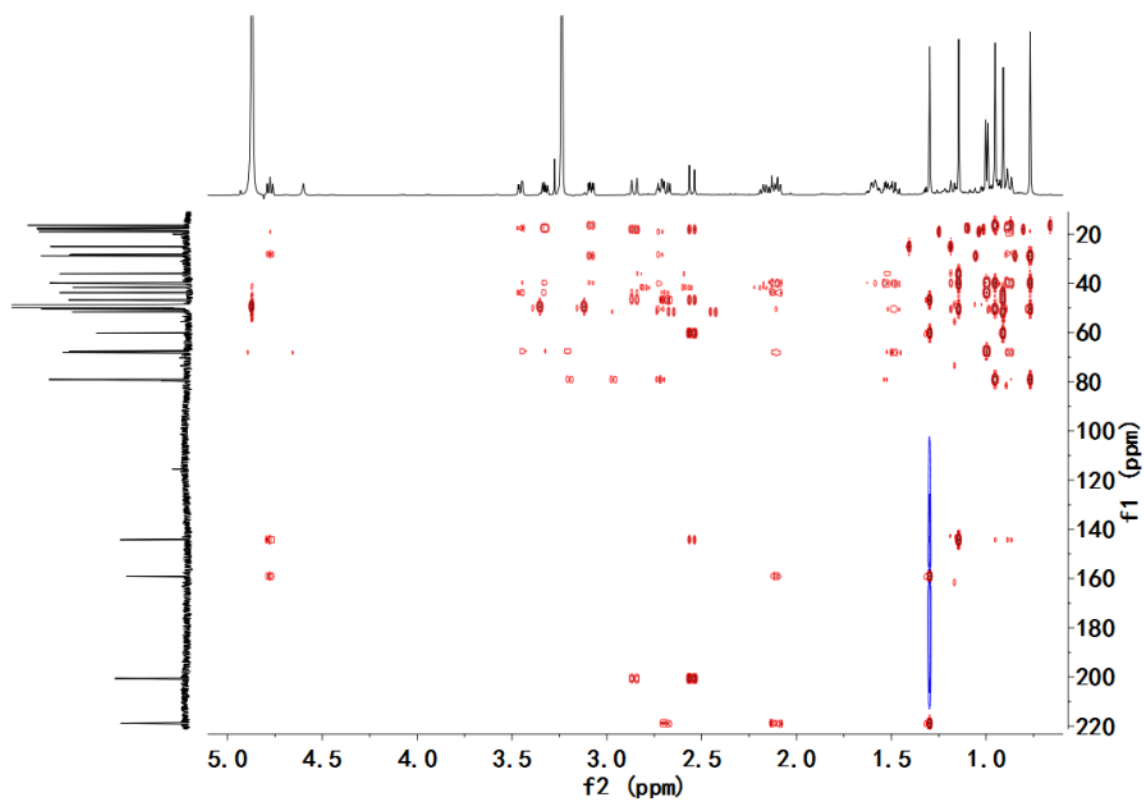

**Fig. S45** HMBC (600 MHz, CD<sub>3</sub>OD) spectrum of ganosineniol C (6)

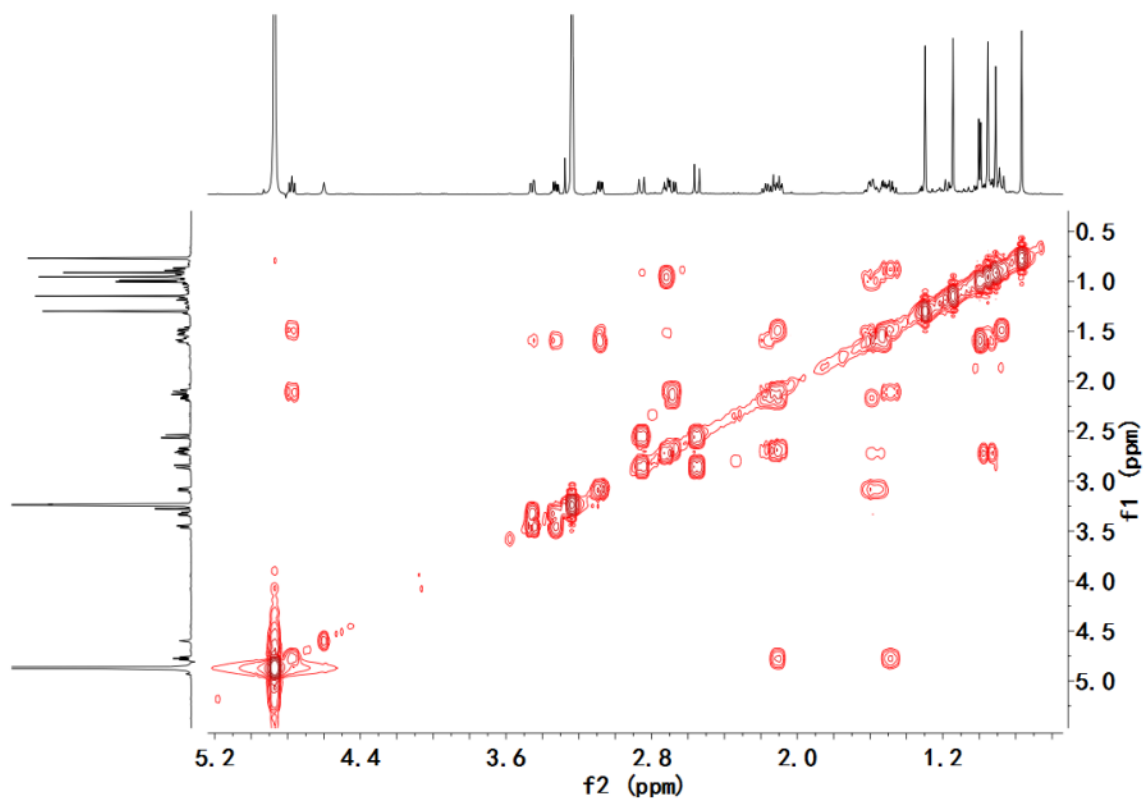

**Fig. S46**  $^1\text{H}$ - $^1\text{H}$  COSY (600 MHz,  $\text{CD}_3\text{OD}$ ) spectrum of ganosineniol C (**6**)

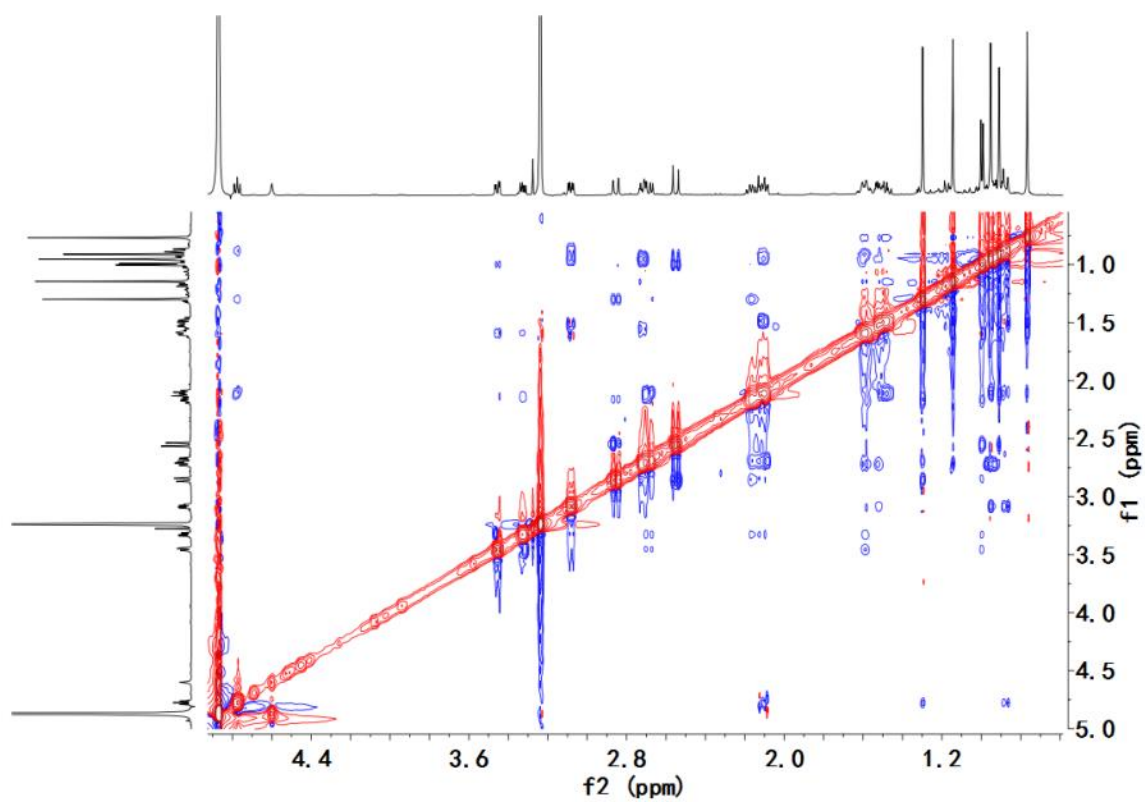

**Fig. S47** ROESY (600 MHz,  $\text{CD}_3\text{OD}$ ) spectrum of ganosineniol C (**6**)

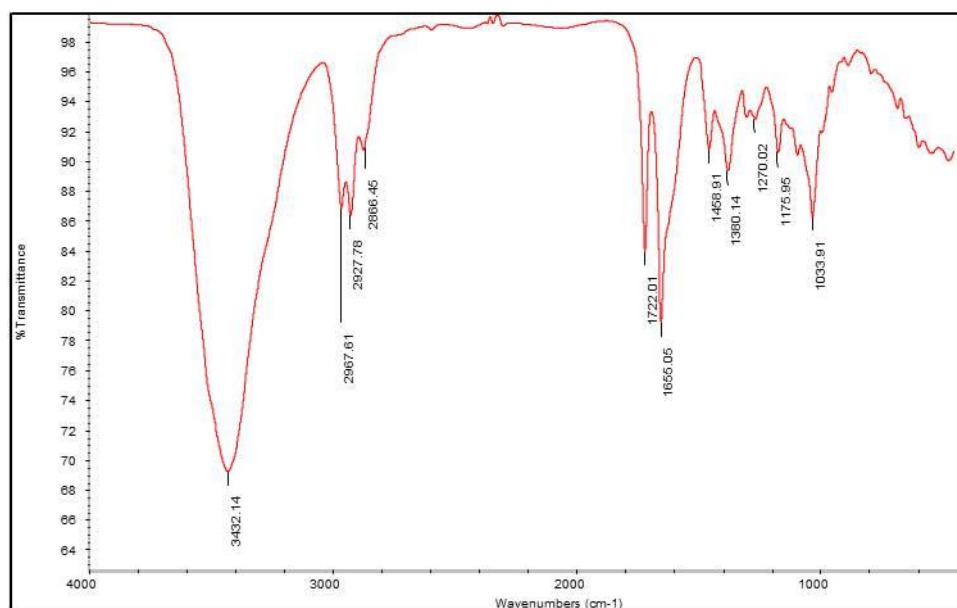

**Fig. S48** IR spectrum of ganosineniol C (**6**)

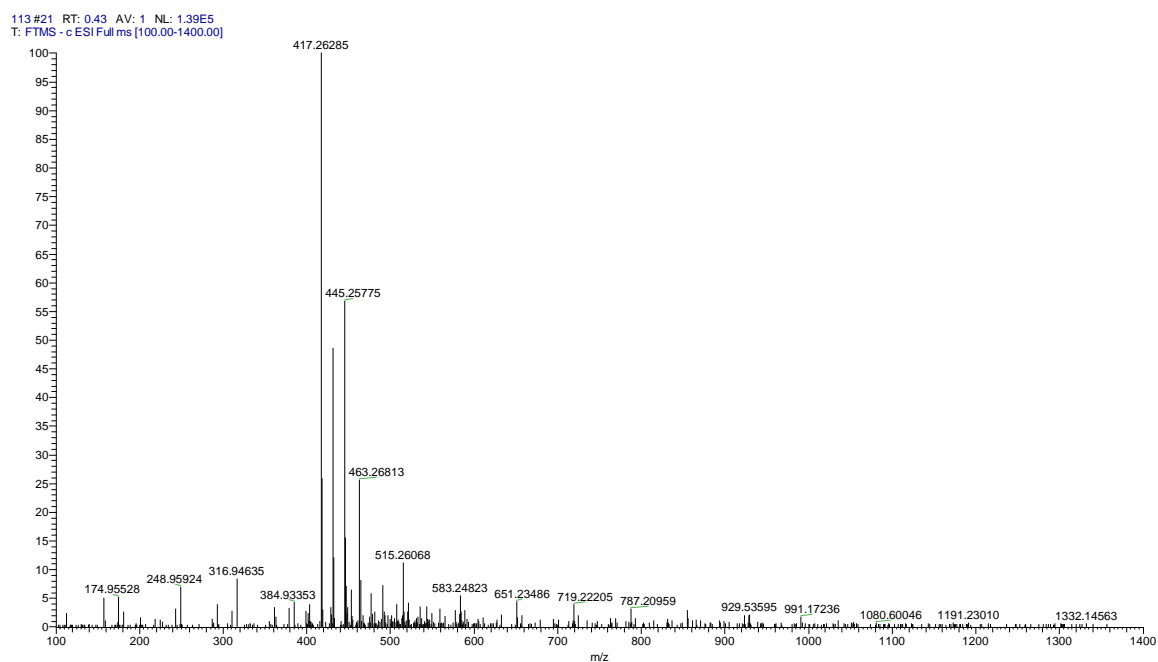

**Fig. S49** HRESIMS spectrum of ganosineniol C (**6**)

**Table S1** Inhibition rate of nortriterpenoids from *Ganoderma* at the concentration of 3 mM

| compounds | Inhibition rate (%) |
|-----------|---------------------|
| <b>3</b>  | 20.68               |
| <b>4</b>  | 13.21               |
| <b>7</b>  | 9.20                |
| <b>8</b>  | 26.74               |
| <b>9</b>  | 5.46                |

|           |       |
|-----------|-------|
| <b>10</b> | 24.67 |
| <b>11</b> | 16.01 |
| <b>12</b> | 18.31 |
| <b>13</b> | 19.06 |
